# Supplementary material for: All Visible Light Photoswitch Based on the Dimethyldihydropyrene Unit Operating in Aqueous Solutions with High Quantum Yields
Source: PubMed Central journal article supplement (PMC9875246; doi:10.1021/jacsau.2c00552), 2022-12-21
Supplement: au2c00552_si_001.pdf [file au2c00552_si_001.pdf]

## ***Electronic Supplementary Information***

# All Visible-Light Photoswitch Based on the Dimethyldihydropyrene Unit Operating in Aqueous Solutions with High Quantum Yields

*Zakaria Ziani,<sup>†</sup> Saioa Cobo,<sup>†</sup> Frédérique Loiseau,<sup>†</sup> Damien Jouvenot,<sup>†</sup> Elise Lognon,<sup>‡</sup> Martial Boggio-Pasqua,<sup>‡,\*</sup> and Guy Royal<sup>†,\*</sup>*

<sup>†</sup>Univ. Grenoble Alpes, CNRS, DCM, 38000 Grenoble, France

<sup>‡</sup>LCPQ UMR 5626, CNRS et Université Toulouse III – Paul Sabatier, 118 route de Narbonne, 31062 Toulouse, France

### **Corresponding Authors**

Email: guy.royal@univ-grenoble-alpes.fr

Email: martial.boggio@irsamc.ups-tlse.fr

### **Table of contents**

|                                                              |    |
|--------------------------------------------------------------|----|
| 1. Synthesis of BDHPPy <sup>+</sup> .....                    | 2  |
| 2. Mass spectrometry data.....                               | 6  |
| 3. <sup>1</sup> H and <sup>13</sup> C NMR data .....         | 9  |
| 4. Absorption Data .....                                     | 14 |
| 5. Electrochemical Data.....                                 | 15 |
| 6. Kinetic and Thermodynamic data .....                      | 16 |
| 7. Quantum yields for the photoisomerization processes ..... | 19 |
| 8. Photo-kinetics experiments and data .....                 | 20 |
| 9. Cartesian coordinates for optimized structures.....       | 33 |
| 10. References.....                                          | 46 |

## 1. Synthesis of BDHPPy<sup>+</sup>

2,7-Di-tert-butyl-trans-10b,10c-dimethyl-10b,10c-dihydropyrene (**tBuDHP**) and 4-bromo-2,7-di-tert-butyl-trans-10b,10c-dimethyl-10b,10c-dihydropyrene (**DHPBr**) were prepared following previously reported procedures.<sup>1</sup> **BFDHP**<sup>2</sup> and **BDHP**<sup>2</sup> and **BDHPBr**<sup>3</sup> were prepared using slightly modified procedures. **BDHPPy<sup>+</sup>** was prepared using the synthetic route represented in Scheme S1.

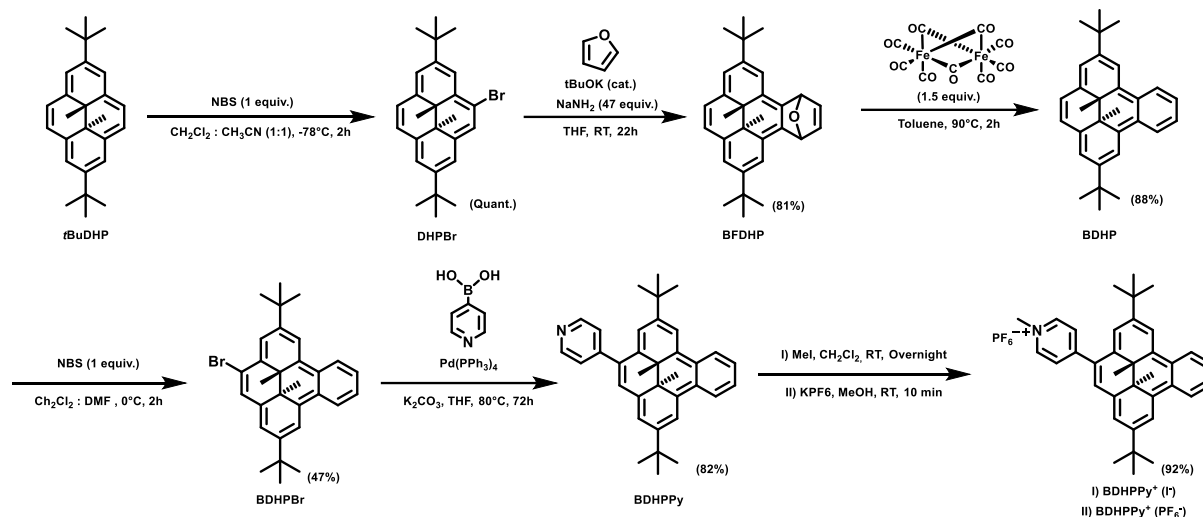

**Scheme S1:** Synthesis of **BDHPPy<sup>+</sup>**

### 2,7-di-tert-butyl-trans-10b,10c-dimethyl-10b,10c-dihydro-9,12-tetrahydro-9,12-epoxybenzo[e]pyren (**BFDHP**)<sup>2</sup>

Sodium amide (2.23 g, mmol) and *t*BuOK (~ 15 mg) were added under argon to a solution of **DHPBr** (500 mg, 1.18 mmol) and furan (7.2 mL) in dry THF (20 mL) in an oven dried schlenk with good magnetic stirring. After 22 hours, cyclohexane (100 mL) was added and after 10 minutes of stirring, the mixture was allowed to settle. The dark green solution was decanted carefully on celite (5 cm) and silica (2 cm). The reaction mixture solids were further rinsed with tetrahydrofuran and cyclohexane mixture (1:1) (v:v) until no color remains in the filtrate. The filtrate was evaporated and was purified by column chromatography over silica gel using a gradient of cyclohexane and ethyl acetate from (100:0 to 90:10) (v:v) as eluent. The product was obtained as dark green crystals (392.5 mg, 0.96 mmol, 81 % yield). **WARNING:** the product slowly decomposes in solid phase and rapidly in halogenated solutions.

**m.p:** 190-192°C

**IR:** 2959, 2924, 2864, 1618, 1447, 1361, 1342, 1282, 1261, 1210, 860, 834, 801, 671, 649 cm<sup>-1</sup>

**UV/vis (Cyclohexane) (λ<sub>max</sub> [nm] ε [M<sup>-1</sup>.cm<sup>-1</sup>]):** 465 (1500), 380 (8580), 361 (18600), 268 (2930)

**<sup>1</sup>H RMN (500 MHz, THF-*d*<sub>8</sub>) δ:** 8.25 – 8.15 (m, 4H, H<sub>ar</sub>), 8.11 (s, 2H, H<sub>ar</sub>), 7.11 (dd, *J*<sub>1</sub> = 6, *J*<sub>2</sub> = 2 Hz, 1H, H<sub>ar</sub>), 6.99 (dd, *J*<sub>1</sub> = 6 Hz, *J*<sub>2</sub> = 2 Hz, 1H, H<sub>ar</sub>), 6.48 (dd, *J*<sub>1</sub> = 2 Hz, *J*<sub>2</sub> = 1 Hz, 1H, H<sub>ar</sub>), 6.45 (dd, *J*<sub>1</sub> = 2 Hz, *J*<sub>2</sub> = 1 Hz, 1H, H<sub>ar</sub>), 1.62 (s, 9H, H<sub>tBu</sub>), 1.61 (s, 9H, H<sub>tBu</sub>), -3.18 (s, 3H, H<sub>Me</sub>), -3.43 (s, 3H, H<sub>Me</sub>) ppm

**<sup>13</sup>C RMN (125 MHz, THF-*d*<sub>8</sub>) δ:** 145.86, 145.59, 141.10, 140.81, 138.25, 138.06, 137.94, 137.51, 128.39, 128.02, 125.30, 125.26, 122.17, 122.13, 115.81, 115.50, 81.71, 81.37, 36.45, 33.96, 33.05, 31.83, 17.06, 14.63 ppm

**HRMS (m/z):** DHP: Calcd. for C<sub>30</sub>H<sub>34</sub>O: 410.2604. Found: 410.2600.

### 2,7-di-tert-butyl-trans-10b,10c-dimethyl-10b,10c-dihydrobenzo[e]pyren (BDHP)<sup>2</sup>

A solution of **BDHP** (219 mg, 0.53 mmol) and Fe<sub>2</sub>(CO)<sub>9</sub> (280 mg, mmol) in dry toluene (20 mL) was stirred at 90 °C in the dark, under argon atmosphere for 2h. After cooling, the mixture was filtered through a silica plug (5 cm) using toluene as eluent. The intense red solution was evaporated in the dark. The crude solid was dissolved in a minimum of cyclohexane and was filtered on a silica plug (5 cm) in order to remove the unreacted compound. The product was obtained as red crystals (185.5 mg, 0.47 mmol) in 88% yield.

**m.p:** 171-173 °C

**IR:** 2961, 2923, 2864, 1618, 1603, 1474, 1459, 1445, 1361, 1335, 1264, 883, 872, 752, cm<sup>-1</sup>

**UV/vis (Cyclohexane) (λ<sub>max</sub> [nm] ε [M<sup>-1</sup>.cm<sup>-1</sup>]) / closed isomer:** 504 (7000), 388 (35000), 369 (26400), 338 (27800), 321 (25500), 308 (24900)

**UV/vis (Cyclohexane) (λ<sub>max</sub> [nm] ε [M<sup>-1</sup>.cm<sup>-1</sup>]) / open isomer:** 346 (9260), 267 (29300)

**<sup>1</sup>H RMN (500 MHz, CDCl<sub>3</sub>) δ:** 8.77 (m, 2H, H<sub>ar</sub>), 8.28 (d, *J* = 1 Hz, 2H, H<sub>ar</sub>), 7.61 (m, 2H, H<sub>ar</sub>), 7.35 (d, *J* = 1 Hz, 2H, H<sub>ar</sub>), 7.13 (s, 2H, H<sub>ar</sub>), 1.49 (s, 18H, H<sub>tBu</sub>), -1.58 (s, 6H, H<sub>Me</sub>) ppm

**<sup>13</sup>C RMN (125 MHz, CDCl<sub>3</sub>) δ:** 144.55, 138.53, 134.88, 129.45, 125.80, 124.63, 121.13, 119.87, 117.12, 35.56, 35.39, 30.84, 17.55 ppm

**HRMS (m/z): DHP:** Calcd. for C<sub>30</sub>H<sub>34</sub>: 394.2655. Found: 394.2653.

### 4-bromo-2,7-di-tert-butyl-trans-10b,10c-dimethyl-10b,10c-dihydrobenzo[e]pyren (BDHPBr)<sup>3</sup>

A solution of NBS (55 mg, 0.31 mmol) in dry DMF (12 mL) was added slowly in the dark to a solution of 2,7-di-tert-butyl-trans-10b,10c-dimethyl-10b,10c-dihydrobenzo[e]pyrene **BDHP** (122 mg, 0.31 mmol) in dry CH<sub>2</sub>Cl<sub>2</sub> (40 mL) under argon at 0 °C. The cooling bath was then removed and the reaction mixture was allowed to stir at room temperature for 1 h. The reaction mixture was poured into cyclohexane (100 mL) and the organic solution was washed with water (3 x 30 mL), brine (30 mL), dried over MgSO<sub>4</sub> and evaporated under reduced pressure. The red residue was dissolved in cyclohexane and was filtered through a plug of silica gel. Evaporation of the filtrate gave the desired compound (69 mg, 0.23 mmol) as a red powder in 74% yield. If needed, the sample can be purified further by recrystallization in cyclohexane.

**m.p:** 178-179 °C

**IR:** 2954, 2910, 2861, 1604, 1552, 1464, 1444, 1357, 1335, 1255, 1237, 1201, 887, 750 cm<sup>-1</sup>

**UV/vis (Cyclohexane) (λ<sub>max</sub> [nm] ε [M<sup>-1</sup>.cm<sup>-1</sup>]) / closed isomer:** 538 (3500), 505 (4180), 472 (3090), 392 (24300), 373 (18000), 339 (17800), 324 (15700), 309 (14200), 293 (10700), 280 (7380), 268 (8580)

**UV/vis (Cyclohexane) (λ<sub>max</sub> [nm] ε [M<sup>-1</sup>.cm<sup>-1</sup>]) / open isomer:** 335 (3790), 321 (3980), 290 (9900), 279 (10300), 261 (17800), 255 (21800)

**<sup>1</sup>H RMN (500 MHz, CDCl<sub>3</sub>) δ:** 8.76 – 8.70 (m, 2H, H<sub>ar</sub>), 8.27 (d, *J* = 1 Hz, 1H, H<sub>ar</sub>), 8.25 (d, *J* = 1 Hz, 1H, H<sub>ar</sub>), 7.67 – 7.62 (m, 3H), 7.28 (s, 1H, H<sub>ar</sub>), 7.25 (s, 1H, H<sub>ar</sub>), 1.52 (s, 9H, H<sub>tBu</sub>), 1.49 (s, 9H, H<sub>tBu</sub>), -1.41 (s, 3H, H<sub>Me</sub>), -1.42 (s, 3H, H<sub>Me</sub>) ppm

**<sup>13</sup>C RMN (125 MHz, CDCl<sub>3</sub>) δ:** 148.5, 146.8, 146.3, 139.6, 135.5, 135.3, 133.1, 129.2, 126.2, 124.7, 124.5, 118.7, 118.5, 117.3, 117.1, 114.1, 38.8, 35.8, 35.7, 35.5, 30.5, 17.8, 17.0 ppm

**HRMS (m/z): DHP:** Calcd. for C<sub>30</sub>H<sub>33</sub>Br: 472.1760. Found: 472.1752.

### 4-(4-pyridyl)-2,7-di-tert-butyl-trans-10b,10c-dimethyl-10b,10c-dihydrobenzo[e]pyren (BDHPy)<sup>3</sup>

A round bottom flask was filled under an argon atmosphere with 4-bromo-2,7-di-tert-butyl-trans-10b,10c-dimethyl-10b,10c-dihydrobenzo[e]pyrene **BDHPBr** (100 mg, 0.21 mmol), 4-pyridinylboronic acid (34 mg, 0.28 mmol), potassium carbonate (139.6 mg, 1.01 mmol), tetrakis(triphenylphosphine) palladium(0) (24.3 mg, 0.021 mmol). Freshly distilled tetrahydrofuran (10 mL) and distilled water (3 mL) were then added. The mixture was heated at 80 °C for 72 h. After cooling

down the mixture to room temperature, the mixture was filtered over celite and the resulting organic layer was diluted in dichloromethane (30 mL). The solution was washed with water (3 x 30 mL), brine (30 mL), dried over anhydrous MgSO<sub>4</sub> and evaporated under reduce pressure. The crude product was purified by column chromatography on silica gel using a gradient of cyclohexane and ethyl acetate (100:0 to 90:10 ; v:v) as eluent. The desired product was obtained (81.7 mg, 0.17 mmol) as a pink solid (yield: 82%).

**m.p:** 182-184°C

**IR:** 2963, 2928, 2865, 1593, 1472, 1408, 1366, 1345, 1258, 1240, 886, 817, 758 cm<sup>-1</sup>

**UV/vis (Cyclohexane) ( $\lambda_{\max}$  [nm]  $\epsilon$  [M<sup>-1</sup>.cm<sup>-1</sup>]) / closed isomer:** 543 (3520), 507 (4130), 475 (3030), 394 (26600), 377 (20120), 341 (18050), 324 (16550), 309 (16160), 269 (20490)

**UV/vis (Cyclohexane) ( $\lambda_{\max}$  [nm]  $\epsilon$  [M<sup>-1</sup>.cm<sup>-1</sup>]) / open isomer:** 359 (3340), 314 (5570), 266 (25670)

**<sup>1</sup>H RMN (500 MHz, CDCl<sub>3</sub>)  $\delta$  / closed isomer :** 8.80 – 8.75 (m, 2H, H<sub>ar</sub>), 8.75 – 8.70 (m, 2H, H<sub>ar</sub>), 8.33 (dd,  $J_1 = 7$  Hz,  $J_2 = 1$  Hz, 2H, H<sub>ar</sub>), 7.66 – 7.63 (m, 2H, H<sub>ar</sub>), 7.55 (d,  $J = 1$  Hz, 1H, H<sub>ar</sub>), 7.53 – 7.49 (m, 2H, H<sub>ar</sub>), 7.40 – 7.38 (m, 1H, H<sub>ar</sub>), 7.17 (d,  $J = 1$  Hz, 1H, H<sub>ar</sub>), 1.53 (s, 9H, H<sub>tBu</sub>), 1.44 (s, 9H, H<sub>tBu</sub>), -1.37 (s, 3H, H<sub>Me</sub>), -1.38 (s, 3H, H<sub>Me</sub>) ppm

**<sup>1</sup>H RMN (500 MHz, CDCl<sub>3</sub>)  $\delta$  / open isomer :** 8.63 – 8.60 (m, 2H, H<sub>ar</sub>), 7.71 – 7.67 (m, 2H, H<sub>ar</sub>), 7.54 – 7.52 (m, 2H, H<sub>ar</sub>), 7.45 – 7.40 (m, 2H, H<sub>ar</sub>), 6.94 – 6.91 (m, 2H, H<sub>ar</sub>), 6.91 – 6.89 (m, 2H, H<sub>ar</sub>), 6.64 (d,  $J = 2$  Hz, 1H, H<sub>ar</sub>), 1.32 (s, 3H, H<sub>Me</sub>), 1.29 (s, 3H, H<sub>Me</sub>), 1.27 (s, 9H, H<sub>tBu</sub>), 1.21 (s, 9H, H<sub>tBu</sub>) ppm

**<sup>13</sup>C RMN (125 MHz, CDCl<sub>3</sub>)  $\delta$ :** 150.21, 149.86, 146.57, 145.81, 138.73, 136.05, 135.37, 134.94, 130.17, 129.71, 129.66, 126.27, 126.21, 125.13, 124.86, 124.65, 123.00, 119.98, 117.42, 117.16, 116.81, 36.36, 35.95, 35.64, 35.62, 30.82, 30.80, 18.03, 17.82 ppm

**HRMS (m/z):** Calcd. for C<sub>35</sub>H<sub>37</sub>N 471.2999. Found. 471.2993.

#### **4-(2,7-di-tert-butyl-trans-10b,10c-dimethyl-10b,10c-dihydrobenzo[e]pyren-4-yl)-1-methylpyridin-1-ium (BDHPPy<sup>+</sup>)**

A solution of 4-(4-pyridyl)-2,7-di-tert-butyl-trans-10b,10c-dimethyl-10b,10c-dihydrobenzo[e]pyrene **BDHPPy** (20 mg, 0.042 mmol) in CH<sub>2</sub>Cl<sub>2</sub> (10 mL) was prepared under inert atmosphere. Methyl iodide (1 mL, excess) was added to the previous solution and the resulting mixture was allowed to stir overnight under inert atmosphere. The solvent was then evaporated under reduced pressure and the residue was dissolved in MeOH (1 mL). The product was subjected to an anion exchange by addition of a saturated aqueous solution of KPF<sub>6</sub> (2 mL). The solid was filtered under vacuum and washed several times with water and diethyl ether. The solid was then dried under reduced pressure to give the targeted product as a brown powder (24 mg, 0.039 mmol) in 92% yield. If needed, the compound can be further purified either by column chromatography over silica gel using a mixture of acetonitrile:MeOH:H<sub>2</sub>O:NaBr (4:1:1:1) (v:v:v:v) followed by a anion exchange using a saturated aqueous solution of KPF<sub>6</sub> (2 mL) in methanol (1 mL) or by a recrystallization in methanol.

**m.p:** 250-252°C

**IR:** 2995, 2956, 2902, 2862, 1635, 1558, 1514, 1462, 1368, 1345, 1258, 873, 842, 752 cm<sup>-1</sup>

**UV/vis (Acetonitrile) ( $\lambda_{\max}$  [nm]  $\epsilon$  [M<sup>-1</sup>.cm<sup>-1</sup>]) / closed isomer:** 661 (800), 556 (3000), 405 (14000), 335 (11000), 307 (13000)

**UV/vis (Acetonitrile) ( $\lambda_{\max}$  [nm]  $\epsilon$  [M<sup>-1</sup>.cm<sup>-1</sup>]) / open isomer:** 455 (3000), 392 (6000), 321 (7000), 284 (13000)

**UV/vis (Water) ( $\lambda_{\max}$  [nm]  $\epsilon$  [M<sup>-1</sup>.cm<sup>-1</sup>]) / closed isomer:** 660 (1100), 557 (2600), 403 (8100), 336 (5400), 309 (6100), 259 (4400)

**UV/vis (Water) ( $\lambda_{\max}$  [nm]  $\epsilon$  [M<sup>-1</sup>.cm<sup>-1</sup>]) / open isomer:** 456 (1800), 392 (4400), 327 (4500), 286 (7100)

**<sup>1</sup>H RMN (500 MHz, CD<sub>3</sub>CN)  $\delta$  / closed isomer :** 8.95 – 8.91 (m, 2H, H<sub>ar</sub>), 8.62 (d,  $J = 6$  Hz, 2H, H<sub>ar</sub>), 8.49 (s, 1H, H<sub>ar</sub>), 8.44 (s, 1H, H<sub>ar</sub>), 8.18 (d,  $J = 6$  Hz, 2H, H<sub>ar</sub>), 7.75 – 7.69 (m, 2H, H<sub>ar</sub>), 7.65 (s, 1H, H<sub>ar</sub>), 7.52 (s,

1H, H<sub>ar</sub>), 7.31 (s, 1H, H<sub>ar</sub>), 4.32 (s, 3H, H<sub>NMe</sub>), 1.51 (s, 9H, H<sub>tBu</sub>), 1.47 (s, 9H, H<sub>tBu</sub>), -1.39 (s, 3H, H<sub>Me</sub>), -1.44 (s, 3H, H<sub>Me</sub>) ppm

**<sup>1</sup>H RMN (500 MHz, CD<sub>3</sub>CN) δ/ open isomer:** 8.47 (d, *J* = 7 Hz, 2H, H<sub>ar</sub>), 8.10 (d, *J* = 7 Hz, 2H, H<sub>ar</sub>), 7.81 – 7.68 (m, 2H, H<sub>ar</sub>), 7.48 – 7.45 (m, 2H, H<sub>ar</sub>), 7.42 (s, 1H, H<sub>ar</sub>), 7.09 (d, *J* = 2 Hz, 1H, H<sub>ar</sub>), 7.02 (d, *J* = 2 Hz, 1H, H<sub>ar</sub>), 7.01 (d, *J* = 2 Hz, 1H, H<sub>ar</sub>), 6.69 (d, *J* = 2 Hz, 1H, H<sub>ar</sub>), 4.25 (s, 3H, H<sub>NMe</sub>), 1.28 (s, 3H, H<sub>Me</sub>), 1.27 (s, 9H, H<sub>tBu</sub>), 1.22 (s, 9H, H<sub>tBu</sub>), 1.21 (s, 3H, H<sub>Me</sub>) ppm

**<sup>13</sup>C RMN (125 MHz, CD<sub>3</sub>CN) δ/ closed isomer:** 159.05, 151.36, 147.86, 145.53, 139.92, 139.31, 138.61, 136.06, 130.40, 129.99, 129.22, 128.08, 127.69, 127.37, 126.16, 125.76, 121.93, 120.68, 118.97, 115.92, 48.41, 37.74, 36.89, 36.27, 36.11, 30.65, 30.57, 18.27, 18.21 ppm

**<sup>13</sup>C RMN (125 MHz, CD<sub>3</sub>CN) δ/ open isomer:** 159.71, 153.13, 151.64, 145.55, 144.34, 144.29, 142.66, 141.66, 141.33, 140.57, 140.56, 140.40, 137.22, 137.11, 131.44, 130.94, 129.88, 129.82, 129.76, 125.74, 125.35, 48.25, 35.00, 34.86, 31.42, 31.34, 19.83, 18.85 ppm

**HRMS (m/z):** Calcd. for C<sub>36</sub>H<sub>40</sub>N<sup>+</sup> 486.3155. Found. 486.3142.

## 2. Mass spectrometry data

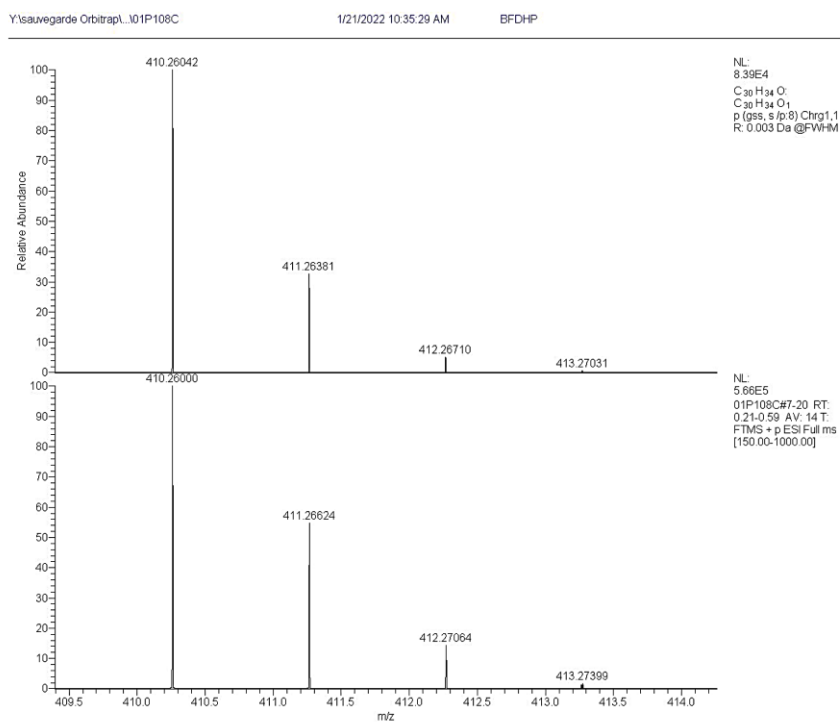

**Figure S1:** High-resolution mass spectrum of **BFDHP** (top: experimental, bottom: calculated).

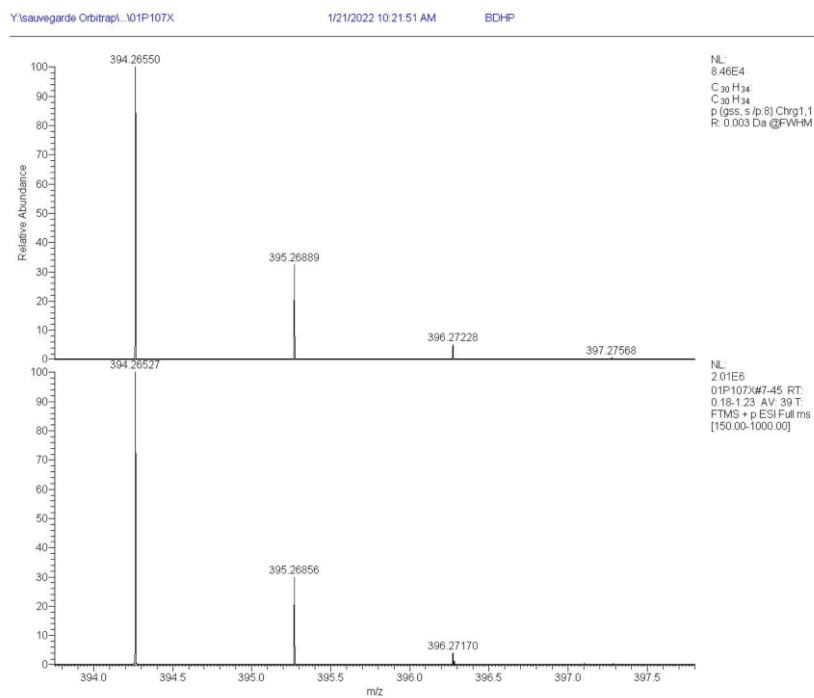

**Figure S2:** High-resolution mass spectrum of **BDHP** (top: experimental, bottom: calculated).

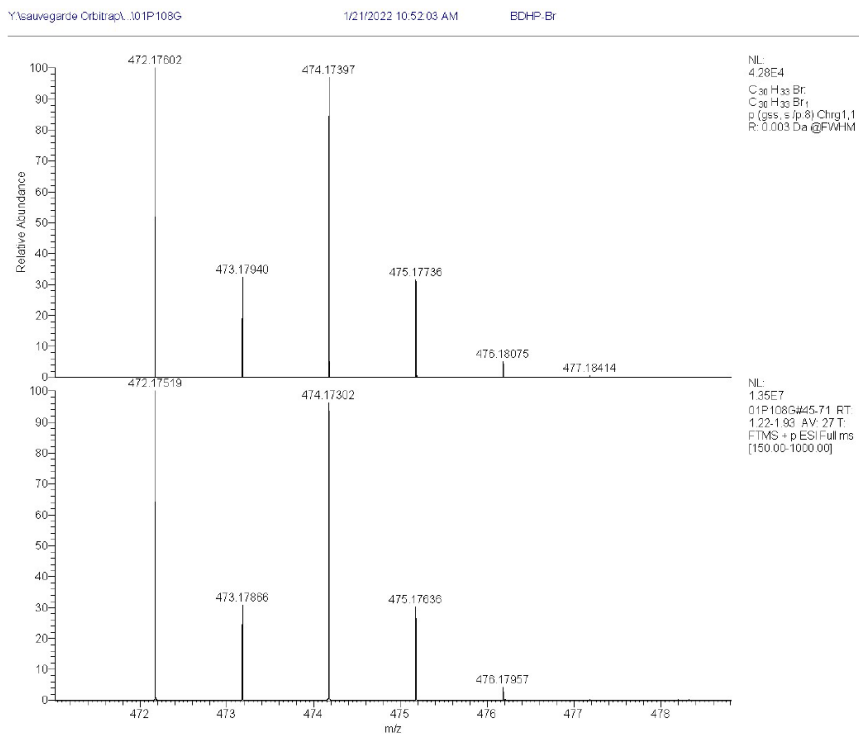

**Figure S3:** High-resolution mass spectrum of **BDHPBr** (top: experimental, bottom: calculated).

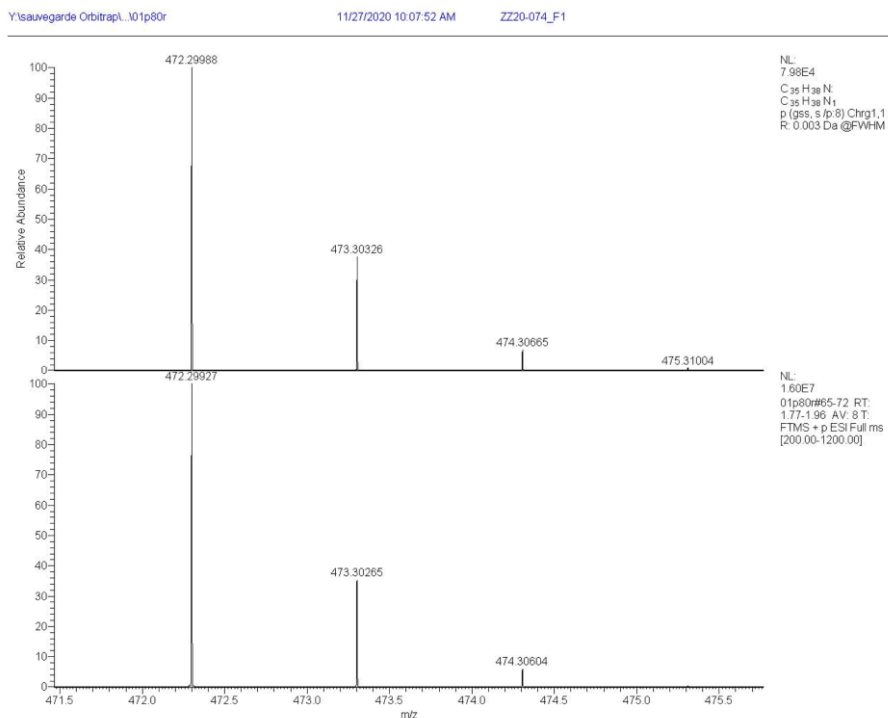

**Figure S4:** High-resolution mass spectrum of **BDHPy** (top: experimental, bottom: calculated).

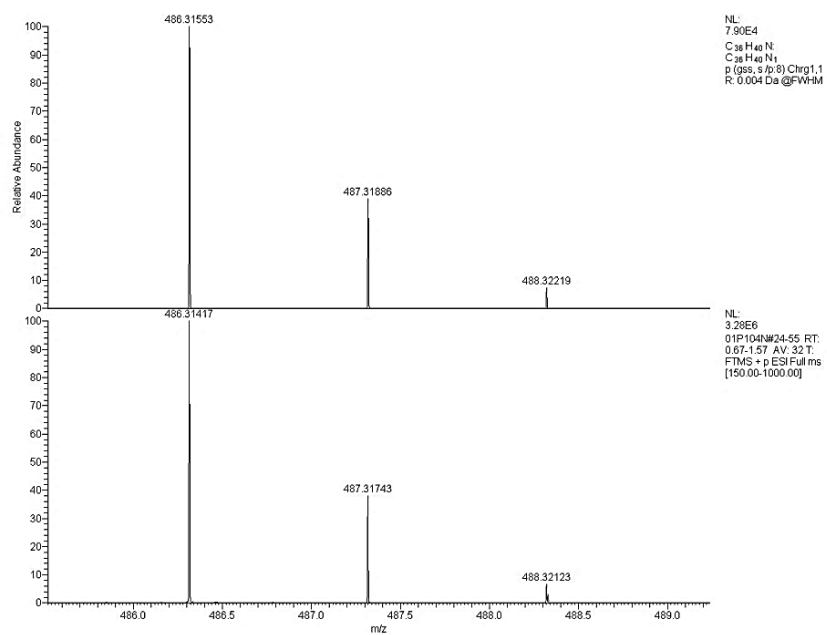

**Figure S5:** High-resolution mass spectrum of **BDHPPy<sup>+</sup>** (top: experimental, bottom: calculated).



### 3. $^1\text{H}$ and $^{13}\text{C}$ NMR data

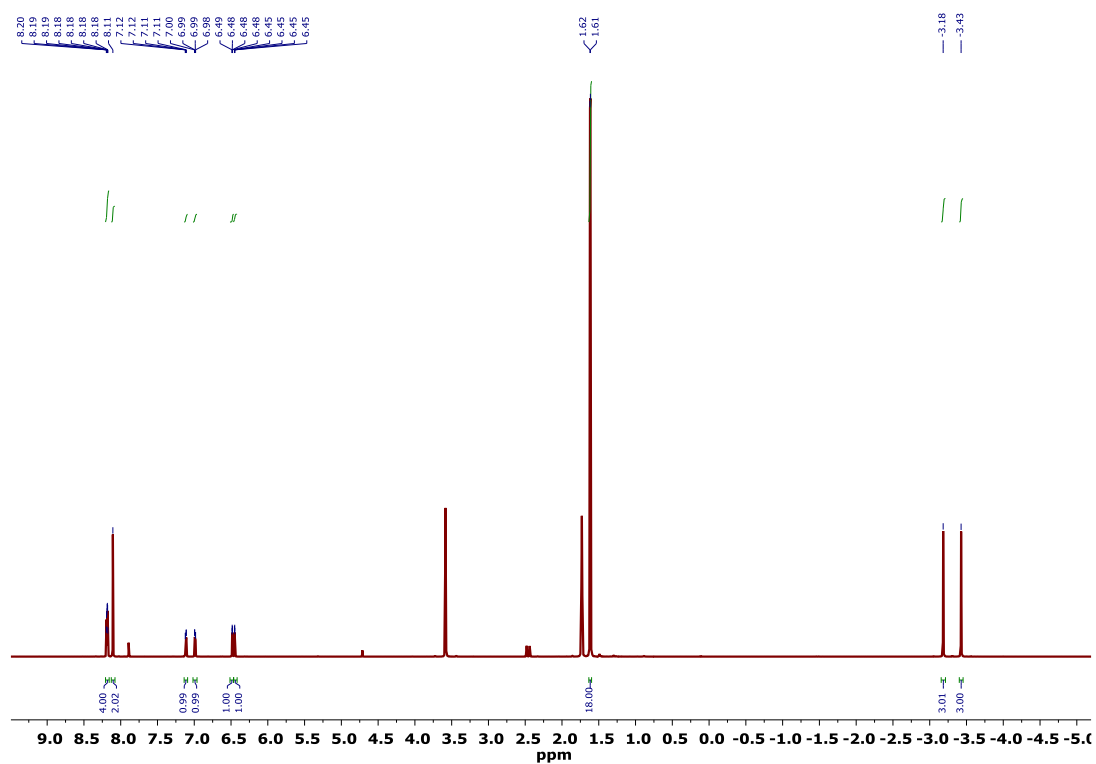

Figure S6:  $^1\text{H}$  NMR spectrum of BFDHP in  $\text{THF-}d_8$ .

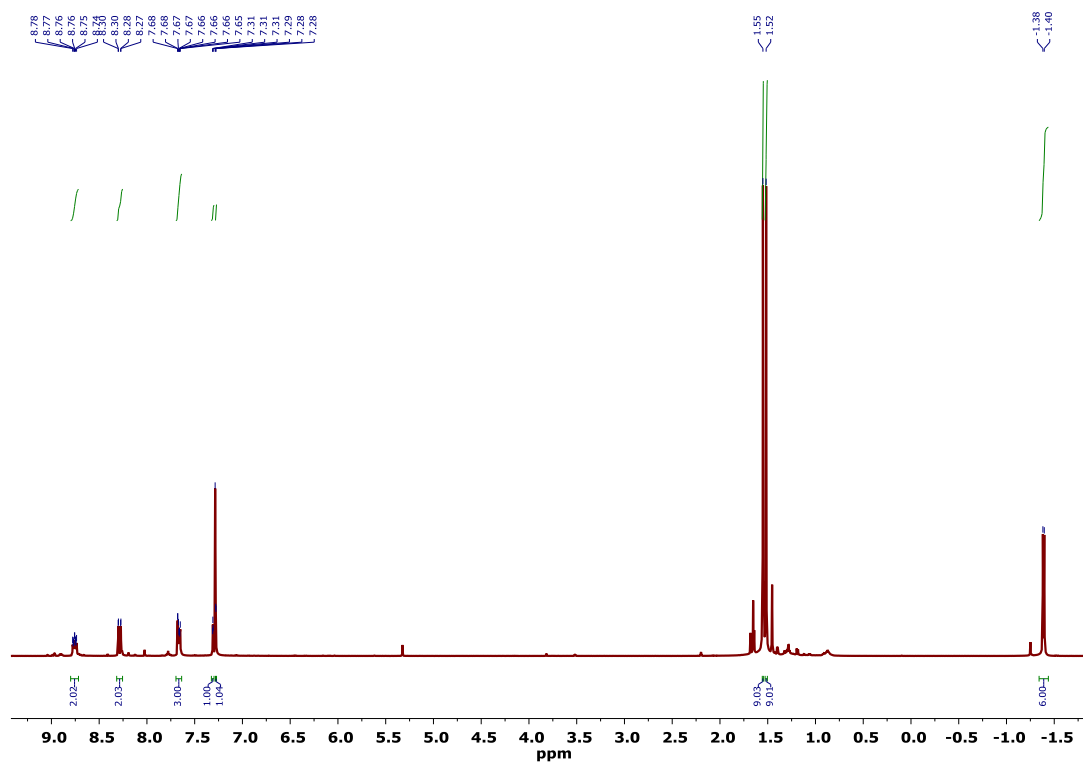

Figure S7:  $^1\text{H}$  NMR spectrum of BDHPBr in  $\text{CDCl}_3$ .



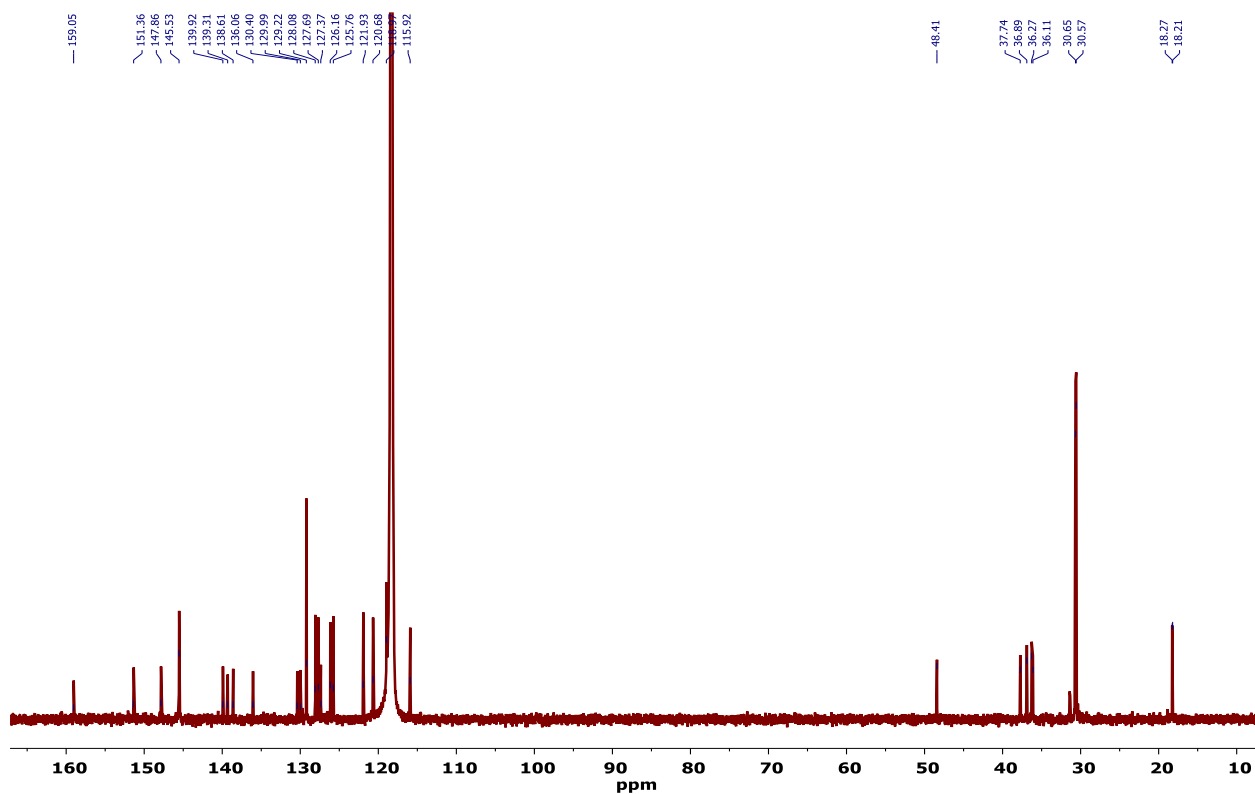

Figure S10:  $^{13}\text{C}$  NMR spectrum of  $\text{BDHPPy}^+$  in  $\text{CD}_3\text{CN}$ .

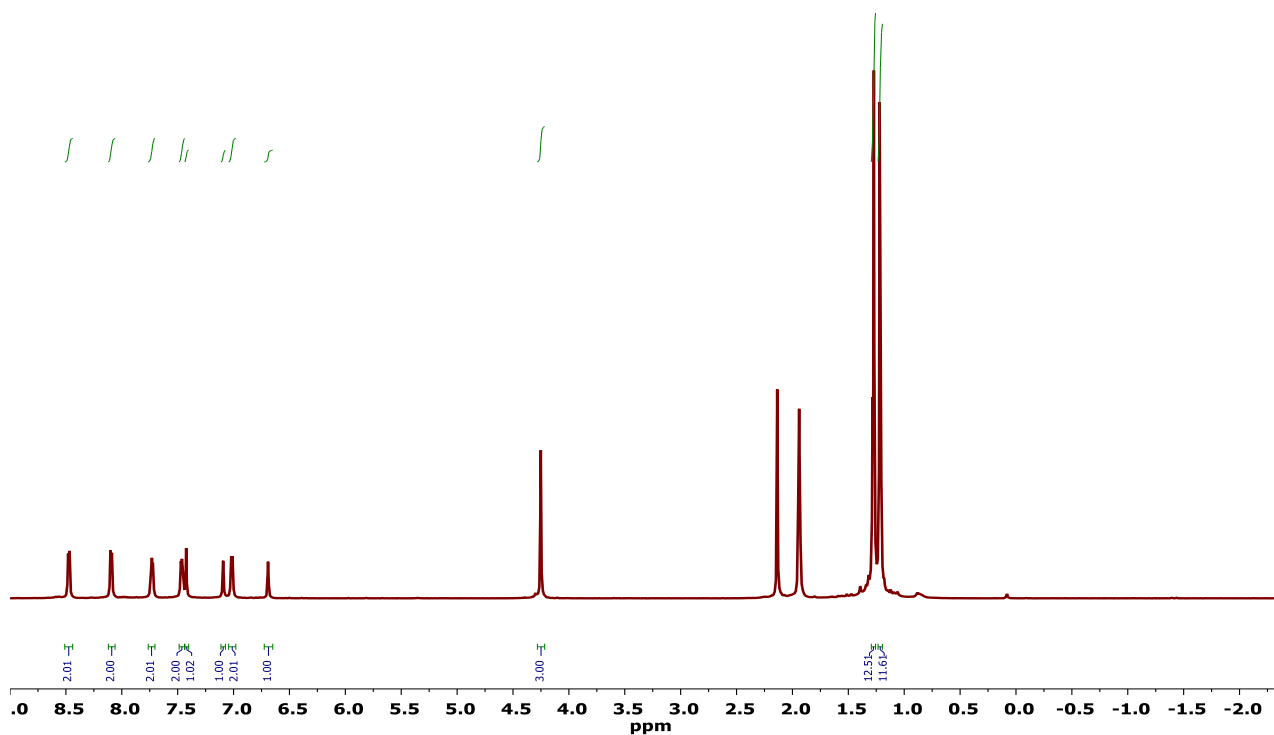

Figure S11:  $^1\text{H}$  NMR spectrum of  $\text{BCPDPy}^+$  in  $\text{CD}_3\text{CN}$ .

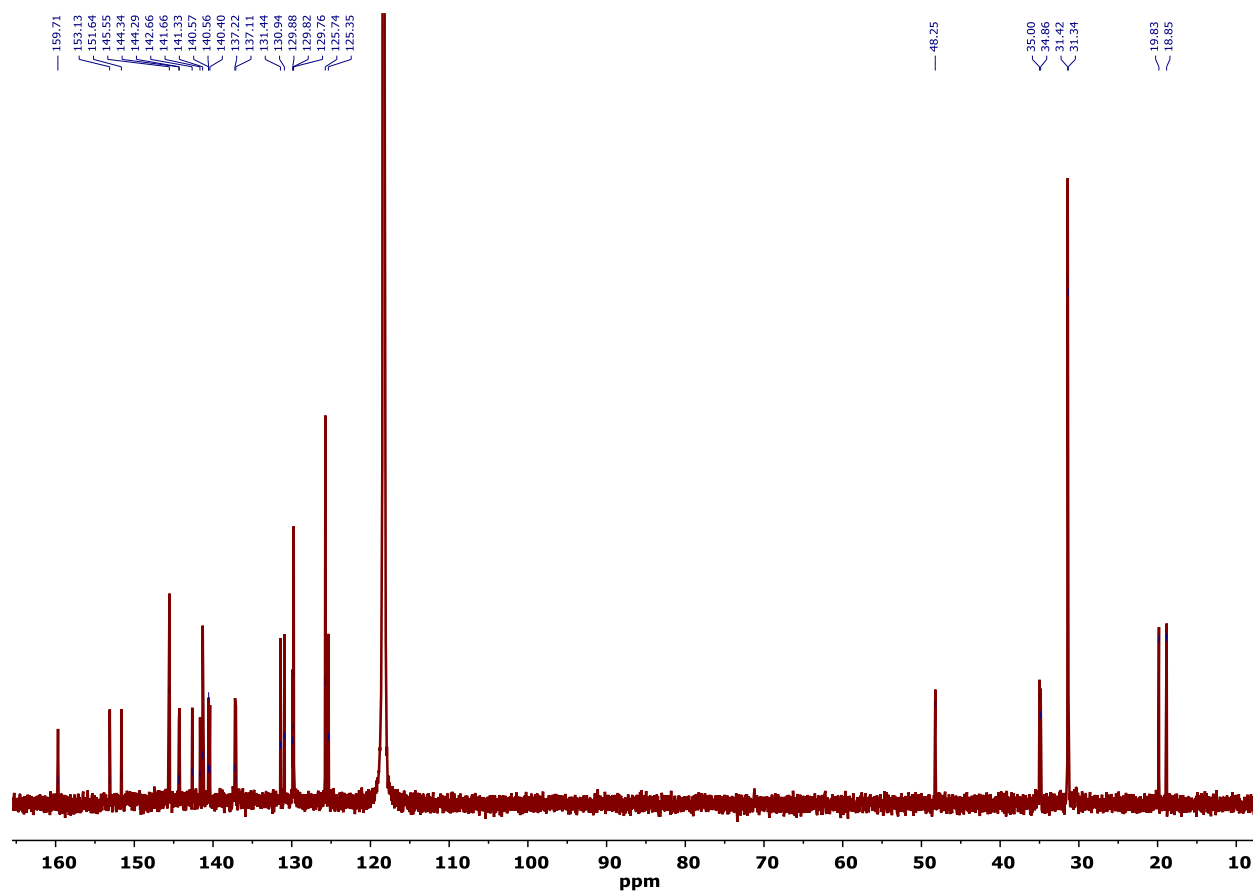

Figure S12:  $^{13}\text{C}$  NMR spectrum of BCPDpy $^+$  in  $\text{CD}_3\text{CN}$ .

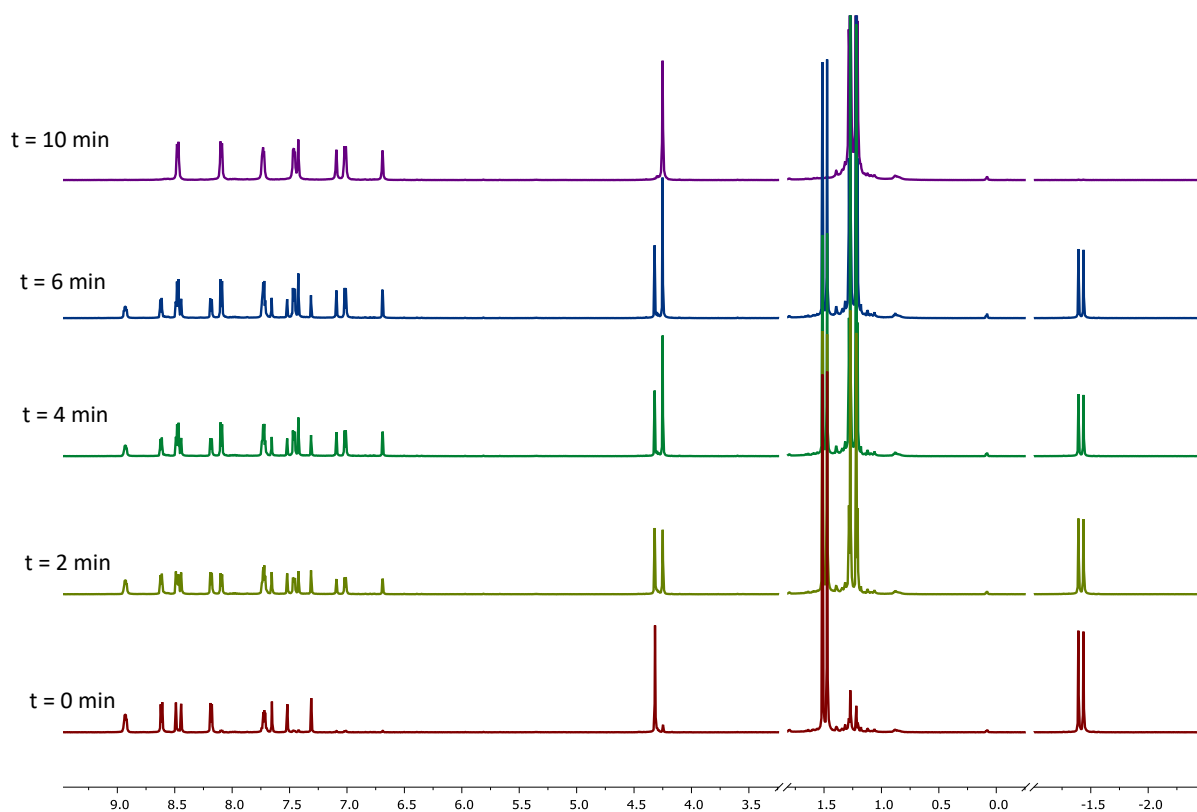

**Figure S13:** Evolution of the  $^1\text{H}$  NMR signals of  $\text{BDHPPy}^+$ ,  $\text{PF}_6^-$  during irradiation ( $\lambda = 660$  nm,  $T = 277\text{K}$ , Conc. = 2 mM in  $\text{CD}_3\text{CN}$ ). The peaks of the initial  $\text{BDHPPy}^+$  are progressively replaced by the signals of the open  $\text{BCPDPy}^+$  isomer.

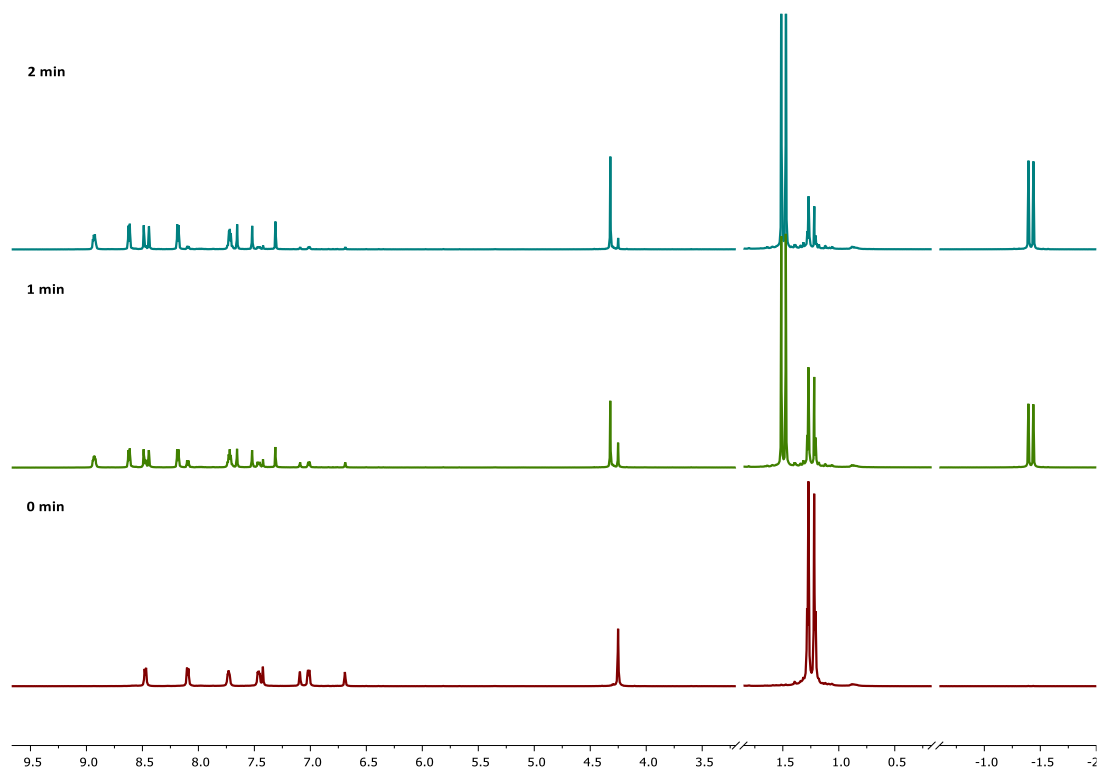

**Figure S14:** Evolution of the  $^1\text{H}$  NMR signals of  $\text{BCPDPy}^+$ ,  $\text{PF}_6^-$  during irradiation ( $\lambda = 470$  nm,  $T = 277\text{K}$ , Conc. = 2 mM in  $\text{CD}_3\text{CN}$ ). The peaks of the initial  $\text{BCPDPy}^+$  are progressively replaced by the signals of the closed  $\text{BDHPPy}^+$  isomer.

## 4. Absorption Data

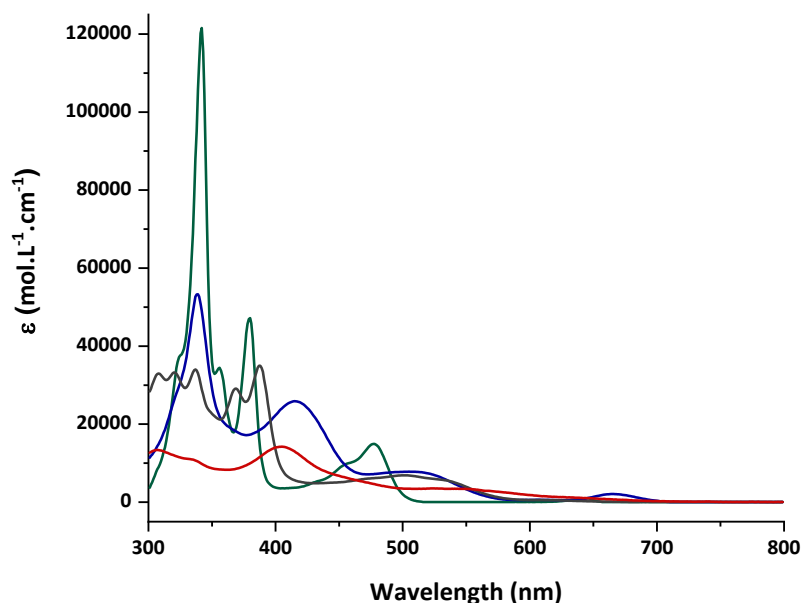

**Figure S15:** UV/vis spectra between 300-800 nm of *t*BuDHP (green line), BDHP (grey line), DHPPy<sup>+</sup> (blue line) and BDHPPy<sup>+</sup> (red line). Solvents used: cyclohexane for *t*BuDHP and BDHP; acetonitrile for DHPPy<sup>+</sup> and BDHPPy<sup>+</sup>.

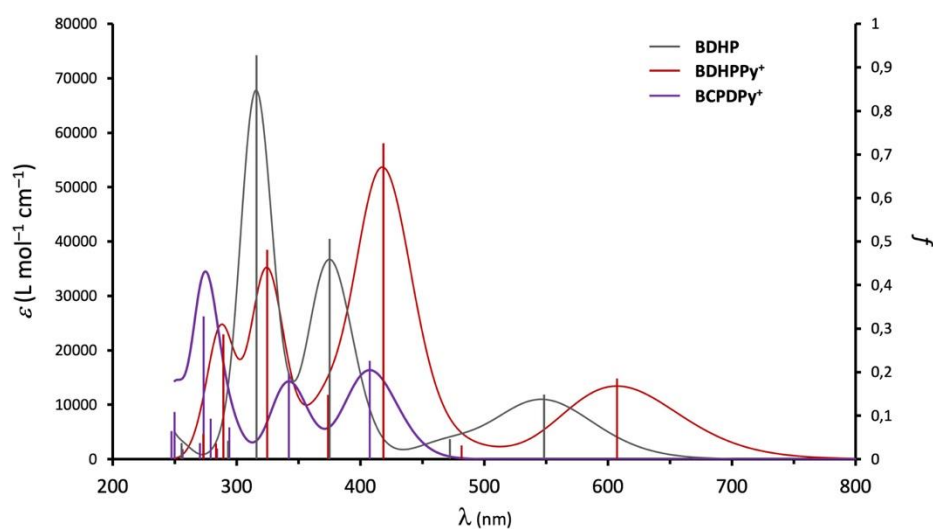

**Figure S16:** Simulated UV/vis absorption spectra between 250 nm-800 nm of BDHP (grey line), BDHPPy<sup>+</sup> (red line) and BCPDPy<sup>+</sup> (purple line) at the TD- $\omega$ B97X-D/6-311G(d,p) level. Solvents used: cyclohexane for BDHP; acetonitrile for BDHPPy<sup>+</sup> and BCPDPy<sup>+</sup>. The oscillator strength ( $f$ ) for each vertical transition is indicated by a vertical line. Convolved spectra are obtained with a phenomenological Gaussian broadening characterized by a half-width at half-height of 1500 cm<sup>-1</sup>.

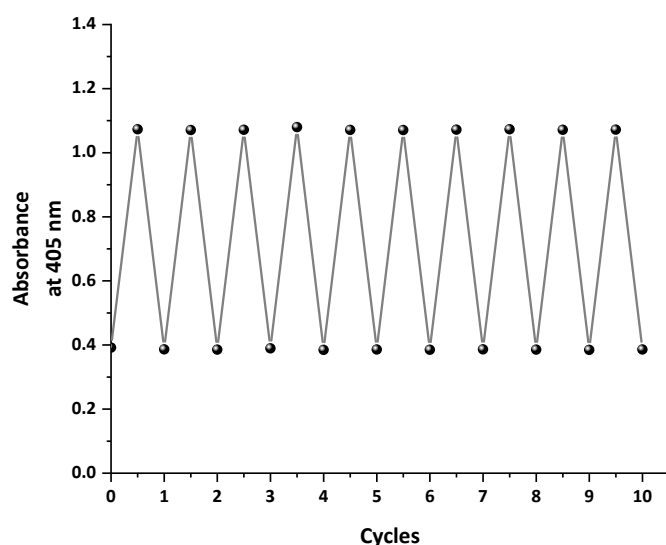

**Figure S17:** Study of the fatigue resistance of the **BDHPPy<sup>+</sup>/BCPDPy<sup>+</sup>** photochromic couple (PF<sub>6</sub><sup>-</sup> salts) in CH<sub>3</sub>CN. The graphical show changes in absorption for each cycle upon alternative illuminations at 470 nm and 660 nm.

## 5. Electrochemical Data

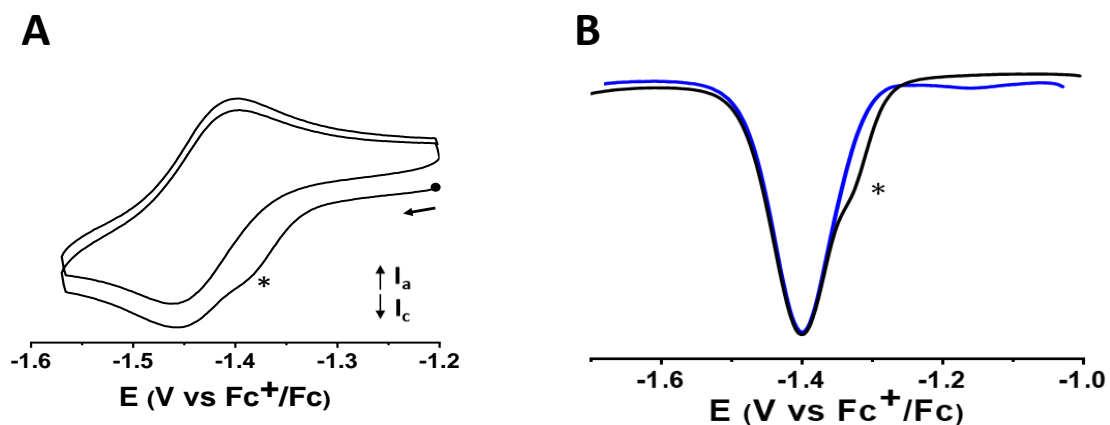

**Figure S18:** (A) 2 consecutive cyclic voltammograms of **BCPDPy<sup>+</sup>** (scan rate: 100  $\text{mv}\cdot\text{s}^{-1}$ ). (B) Differential Pulse Voltammetry of **BCPDPy<sup>+</sup>** (black line) and **BDHPPy<sup>+</sup>** (blue line). [Conc.]  $\sim$  1 mmol in 0.1M TBAPF<sub>6</sub>/CH<sub>3</sub>CN. \* indicates the reduction signal centered on the pyridinium unit in the open form; the signal at lower potential corresponds to the reduction of the closed isomer.

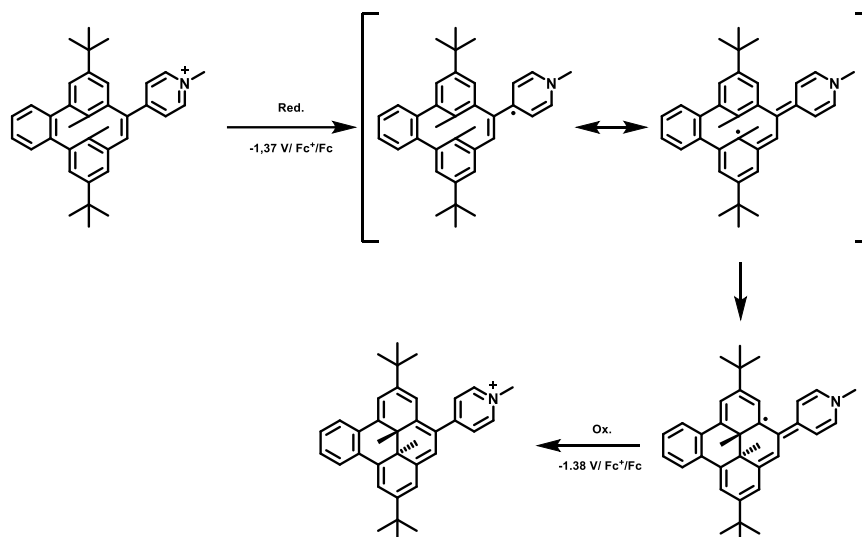

**Figure S19:** Proposed mechanism for the electron induced closing of **BCPDPPy<sup>+</sup>** into **BDHPPy<sup>+</sup>**.

## 6. Kinetic and Thermodynamic data

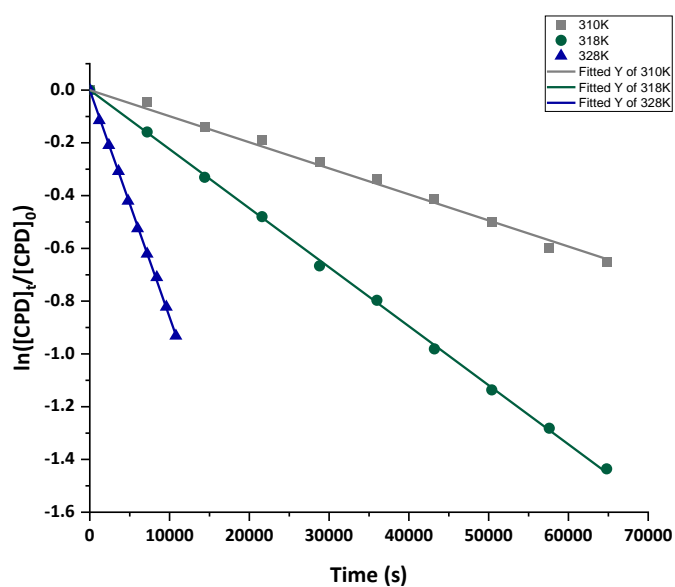

**Figure S20:** Relative pseudo-first order rate constants for the thermal closing (measured at 405 nm) of **BCPDPPy<sup>+</sup>**, PF<sub>6</sub><sup>-</sup> in degassed CH<sub>3</sub>CN followed by absorption spectroscopy.



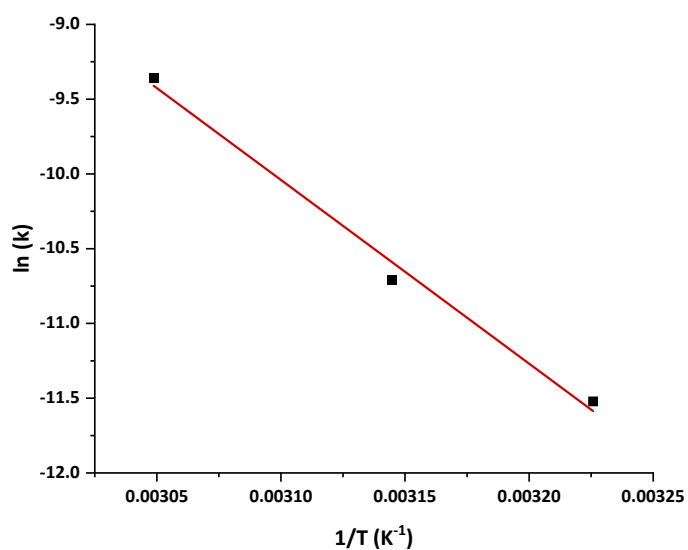

**Figure S21:** Arrhenius plot corresponding to the thermal closing of **BCPDpy<sup>+</sup>**, PF<sub>6</sub><sup>-</sup> in degassed CH<sub>3</sub>CN.

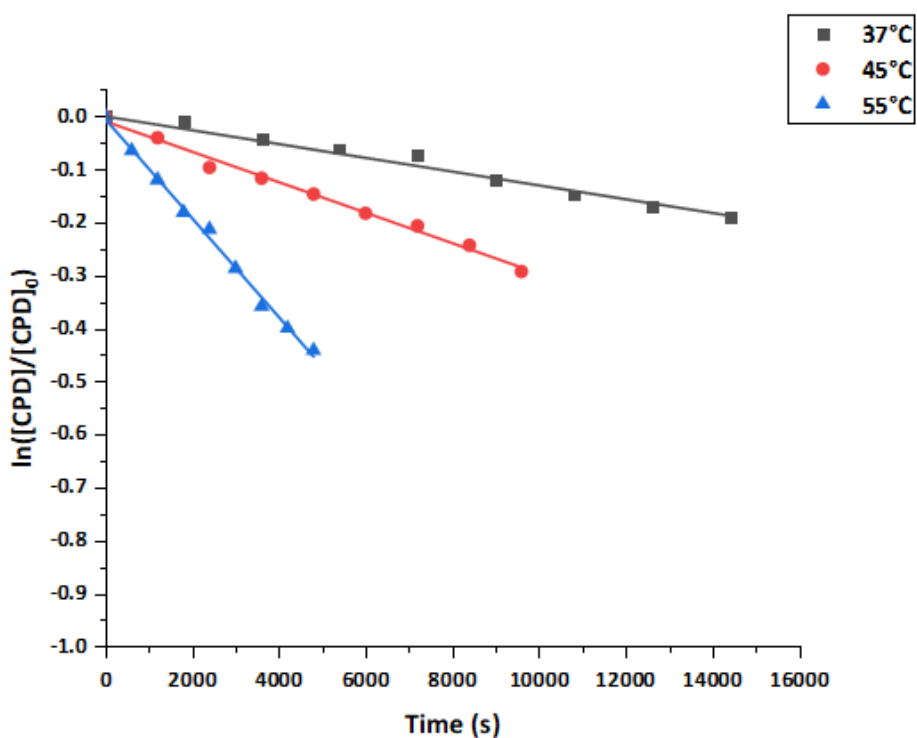

**Figure S22:** Relative pseudo-first order rate constants for the thermal closing (measured at 405 nm) of **BCPDpy<sup>+</sup>**, I<sup>-</sup> in degassed H<sub>2</sub>O followed by absorption spectroscopy.

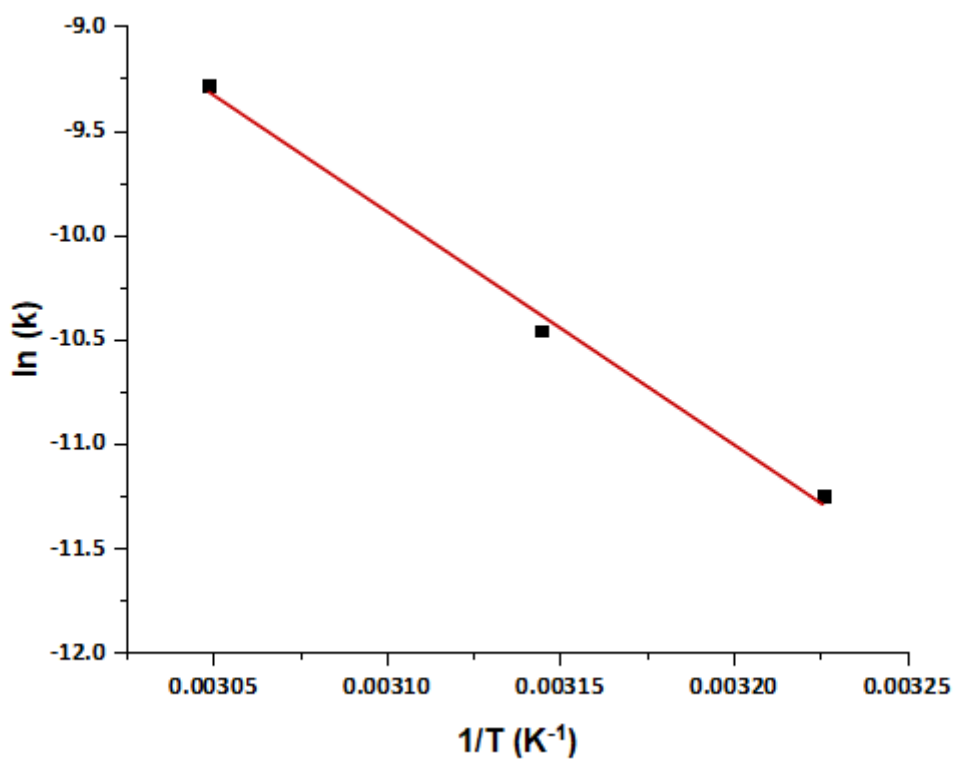

**Figure S23:** Arrhenius plot corresponding to the thermal closing of of **BCPDpy<sup>+</sup>, I<sup>-</sup>** in degassed H<sub>2</sub>O followed by absorption spectroscopy.

## 7. Quantum yields for the photoisomerization processes

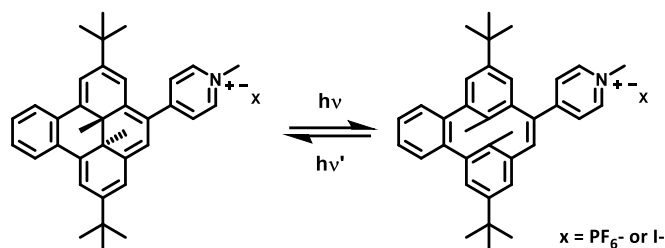

**Table S1.** Quantum yields for the photo-opening ( $\phi_{\text{c-o}}$ ) and photo-closing ( $\phi_{\text{o-c}}$ ) reactions for the **BDHPPy<sup>+</sup>/BCPDPy<sup>+</sup>** couple (as I<sup>-</sup> salt) at different wavelengths, corresponding extinction coefficients  $\epsilon$  of the open and closed isomers and PSS. Solvent: H<sub>2</sub>O

| Wavelength (nm) | $\epsilon_{\text{BDHPPy}^+}$ (M <sup>-1</sup> .cm <sup>-1</sup> ) | $\phi_{\text{c-o}}$ (%) | $\epsilon_{\text{BCPDPy}^+}$ (M <sup>-1</sup> .cm <sup>-1</sup> ) | $\phi_{\text{o-c}}$ (%) | PSS (%) (BDHPPy <sup>+</sup> :BCPDPy <sup>+</sup> ) |
|-----------------|-------------------------------------------------------------------|-------------------------|-------------------------------------------------------------------|-------------------------|-----------------------------------------------------|
| 365             | 4878                                                              | -                       | 3448                                                              | ≈ 100 <sup>[a]</sup>    | 97:3                                                |
| 415             | 7381                                                              | ≈ 100 <sup>[a]</sup>    | 3522                                                              | ≈ 100 <sup>[a]</sup>    | 92:8                                                |
| 450             | 4158                                                              | ≈ 100 <sup>[a]</sup>    | 1972                                                              | ≈ 100 <sup>[a]</sup>    | 95:5                                                |
| 470             | 3488                                                              | ≈ 100 <sup>[a]</sup>    | 1356                                                              | ≈ 100 <sup>[a]</sup>    | 95:5                                                |
| 505             | 2698                                                              | 39.9 ± 0.2              | 607                                                               | ≈ 100 <sup>[a]</sup>    | 56:44                                               |
| 530             | 2708                                                              | 17.5 ± 0.4              | 0                                                                 | 0                       | 100:0                                               |
| 590             | 1972                                                              | 11.0 ± 0.4              | 0                                                                 | 0                       | 100:0                                               |
| 617             | 1452                                                              | 13.5 ± 0.6              | 0                                                                 | 0                       | 100:0                                               |
| 660             | 887                                                               | 15.4 ± 0.1              | 0                                                                 | 0                       | 100:0                                               |
| 680             | 689                                                               | 14.5 ± 0.5              | 0                                                                 | 0                       | 100:0                                               |

[a] High measurement uncertainty due to an overly efficient process.

**Table S2.** Quantum yields for the photo-opening ( $\phi_{\text{c-o}}$ ) and photo-closing ( $\phi_{\text{o-c}}$ ) reactions of the **BDHPPy<sup>+</sup>/BCPDPy<sup>+</sup>** couple (as PF<sub>6</sub><sup>-</sup> salt) at different wavelengths, corresponding extinction coefficients  $\epsilon$  of the open and closed isomers and PSS. Solvent: CH<sub>3</sub>CN

| Wavelength (nm) | $\epsilon_{\text{BDHPPy}^+}$ (M <sup>-1</sup> .cm <sup>-1</sup> ) | $\phi_{\text{c-o}}$ (%) | $\epsilon_{\text{BCPDPy}^+}$ (M <sup>-1</sup> .cm <sup>-1</sup> ) | $\phi_{\text{o-c}}$ (%) | PSS (%) (BDHPPy <sup>+</sup> :BCPDPy <sup>+</sup> ) |
|-----------------|-------------------------------------------------------------------|-------------------------|-------------------------------------------------------------------|-------------------------|-----------------------------------------------------|
| 365             | -                                                                 | -                       | 4254                                                              | 92 ± 3                  | 95:5                                                |
| 415             | 12968                                                             | 19.1 ± 0.4              | 4442                                                              | 86 ± 5                  | 82:18                                               |
| 450             | 6700                                                              | 42 ± 2                  | 2950                                                              | 94 ± 4                  | 95:5                                                |
| 470             | 5020                                                              | 25 ± 5                  | 2079                                                              | 81 ± 3                  | 95:5                                                |
| 505             | 3411                                                              | 28 ± 2                  | 721                                                               | 29.7 ± 0.3              | 74:26                                               |
| 530             | 3092                                                              | 13.0 ± 0.3              | 0                                                                 | 0                       | 100:0                                               |
| 590             | 2258                                                              | 13.2 ± 0.2              | 0                                                                 | 0                       | 100:0                                               |
| 617             | 1399                                                              | 15.8 ± 0.2              | 0                                                                 | 0                       | 100:0                                               |
| 660             | 806                                                               | 16.5 ± 0.2              | 0                                                                 | 0                       | 100:0                                               |
| 680             | 460                                                               | 20.0 ± 0.5              | 0                                                                 | 0                       | 100:0                                               |

## 8. Photo-kinetics experiments and data

### A) Experimental study of the photo-opening process in acetonitrile

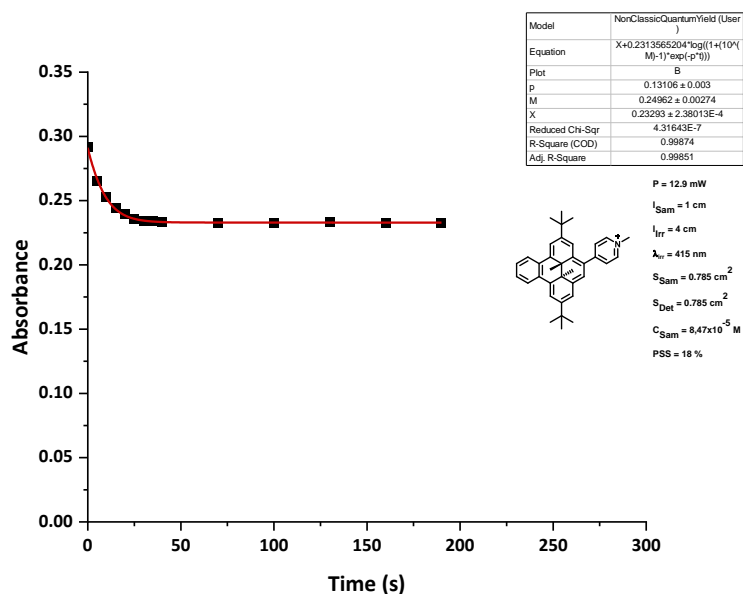

**Figure S24:** Evolution of the absorbance at  $\lambda = 415 \text{ nm}$  during irradiation at  $\lambda_{\text{ex}} = 415 \text{ nm}$  of **BDHPPy<sup>+</sup>, PF<sub>6</sub><sup>-</sup>** in acetonitrile as function of time and corresponding fit using Maafi and Brown photo-kinetic model.

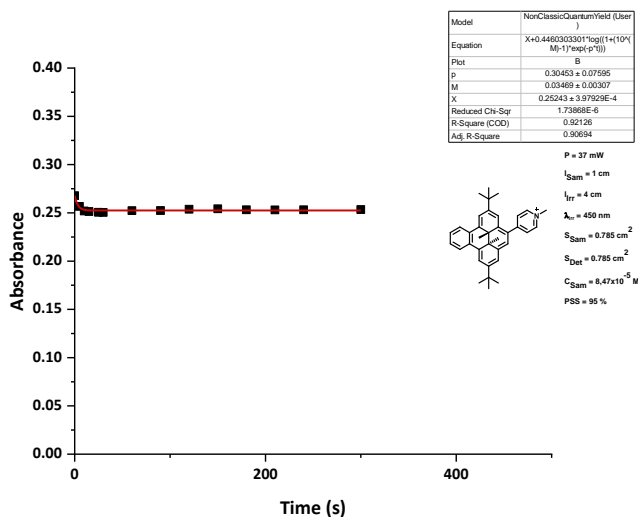

**Figure S25:** Evolution of the absorbance at  $\lambda = 450 \text{ nm}$  during an irradiation at  $\lambda_{\text{ex}} = 450 \text{ nm}$  of **BDHPPy<sup>+</sup>, PF<sub>6</sub><sup>-</sup>** in acetonitrile as function of time and its fit using Maafi and Brown photo-kinetic model.

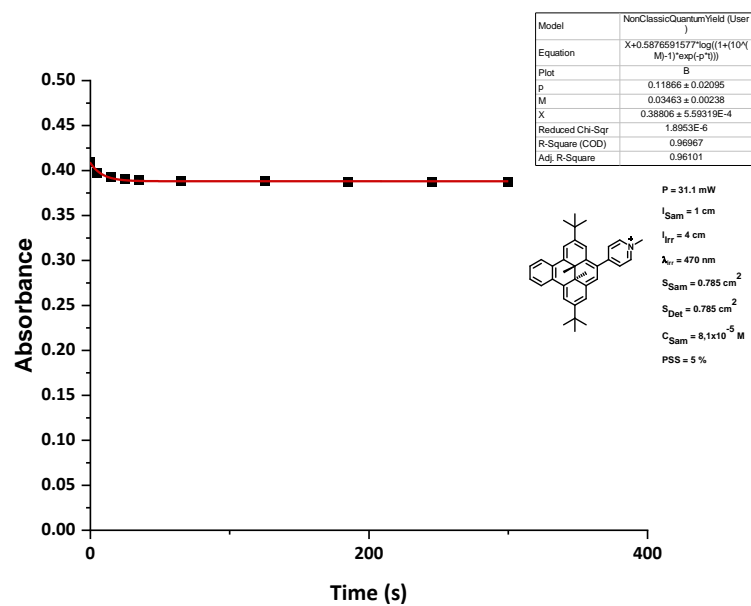

**Figure S26:** Evolution of the absorbance at  $\lambda = 470 \text{ nm}$  during an irradiation at  $\lambda_{\text{ex}} = 470 \text{ nm}$  of **BDHPPy<sup>+</sup>, PF6<sup>-</sup>** in acetonitrile as function of time and its fit using Maafi and Brown photo-kinetic model.

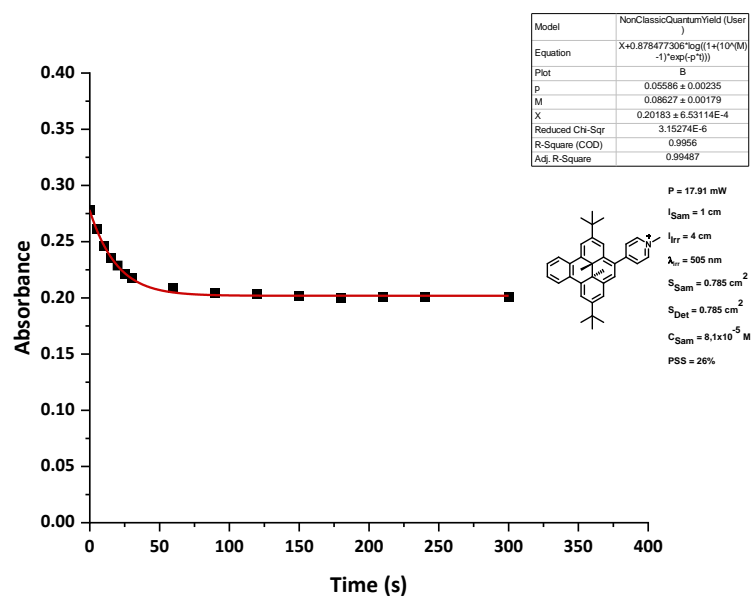

**Figure S27:** Evolution of the absorbance at  $\lambda = 505 \text{ nm}$  during an irradiation at  $\lambda_{\text{ex}} = 505 \text{ nm}$  of **BDHPPy<sup>+</sup>, PF6<sup>-</sup>** in acetonitrile in function of time and its fit using Maafi and Brown photo-kinetic model.

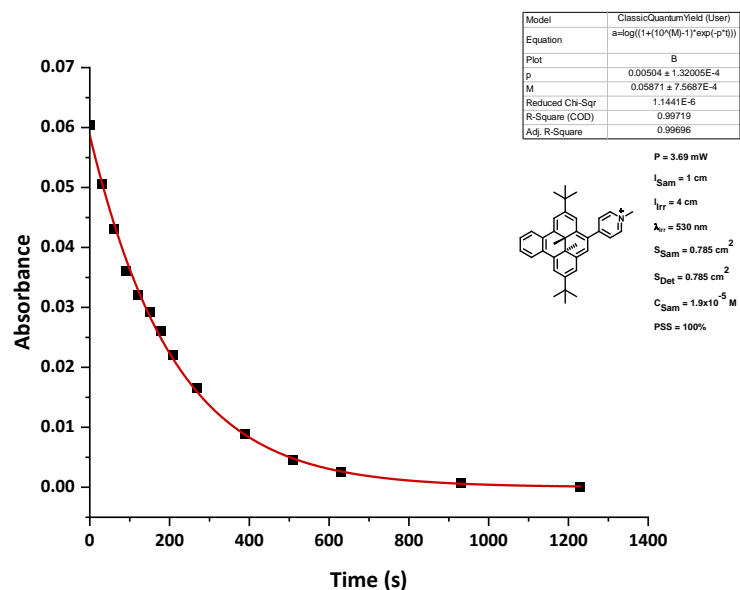

**Figure S28:** Evolution of the absorbance at  $\lambda = 530$  nm during an irradiation at  $\lambda_{ex} = 530$  nm of **BDHPPy<sup>+</sup>, PF<sub>6</sub><sup>-</sup>** in acetonitrile as function of time and its fit using Maafi and Brown photo-kinetic model.

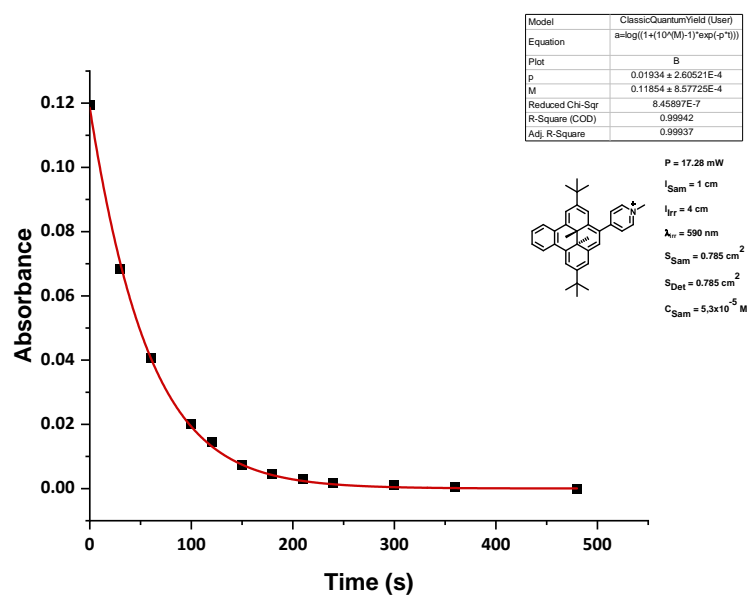

**Figure S29:** Evolution of the absorbance at  $\lambda = 590$  nm during an irradiation at  $\lambda_{ex} = 590$  nm of **BDHPPy<sup>+</sup>, PF<sub>6</sub><sup>-</sup>** in acetonitrile as function of time and its fit using Maafi and Brown photo-kinetic model.

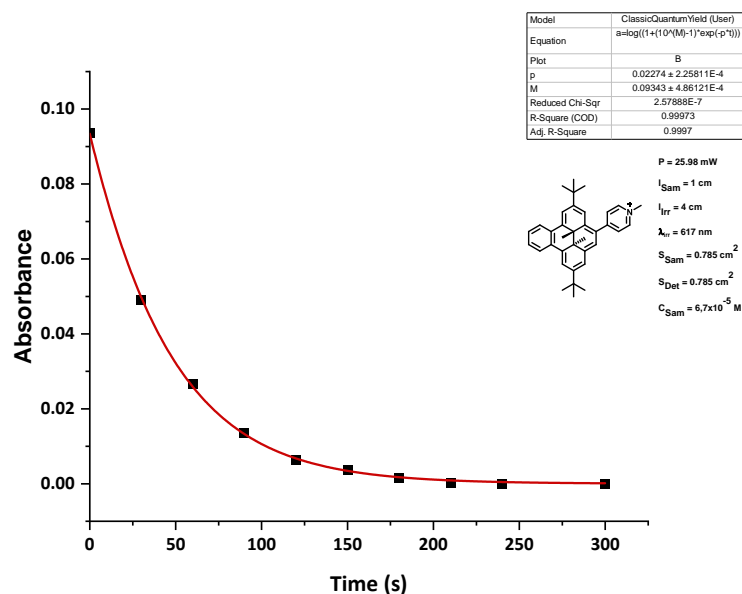

**Figure S30:** Evolution of the absorbance at  $\lambda = 617 \text{ nm}$  during an irradiation at  $\lambda_{\text{ex}} = 617 \text{ nm}$  of **BDHPPy<sup>+</sup>, PF<sub>6</sub><sup>-</sup>** in acetonitrile in function of time and its fit using Maafi and Brown photo-kinetic model.

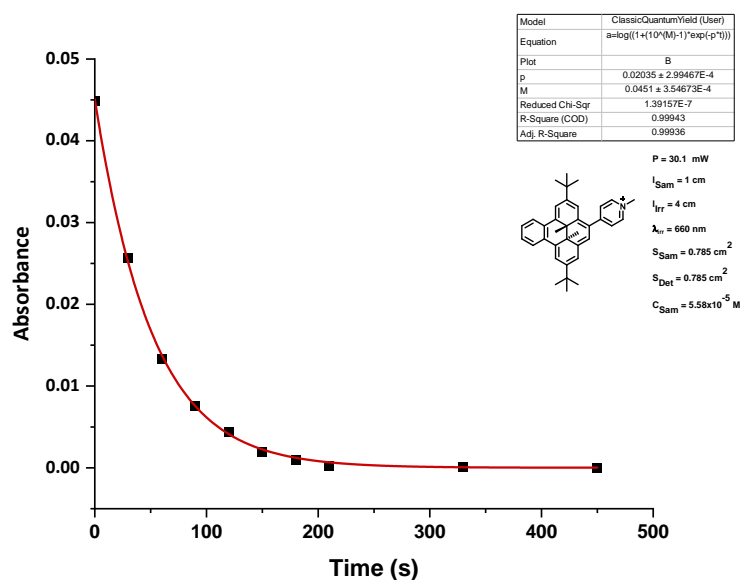

**Figure S31:** Evolution of the absorbance at  $\lambda = 660 \text{ nm}$  during an irradiation at  $\lambda_{\text{ex}} = 660 \text{ nm}$  of **BDHPPy<sup>+</sup>, PF<sub>6</sub><sup>-</sup>** in acetonitrile as function of time and its fit using Maafi and Brown photo-kinetic model.

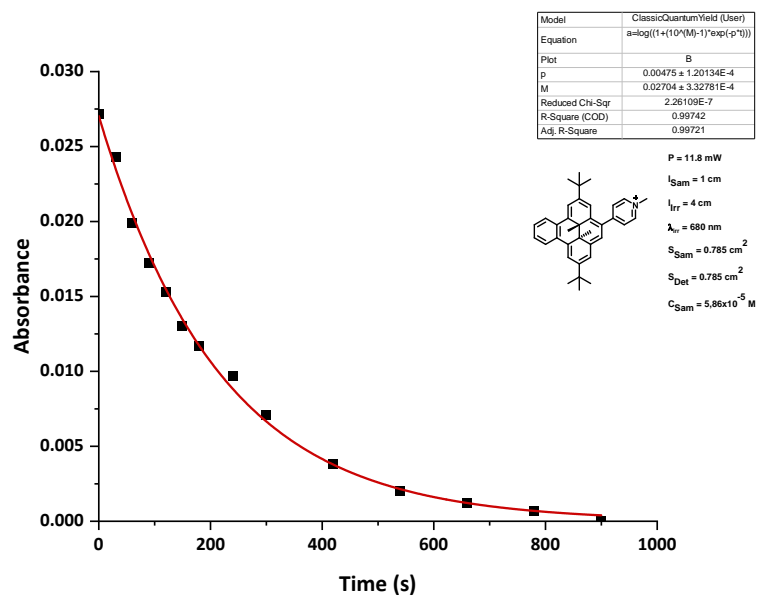

**Figure S32:** Evolution of the absorbance at  $\lambda = 660$  nm during an irradiation at  $\lambda_{ex} = 660$  nm of **BDHPPy<sup>+</sup>, PF<sub>6</sub><sup>-</sup>** in acetonitrile as function of time and its fit using Maafi and Brown photo-kinetic model.

### B) Experimental study of the photo-closing process in acetonitrile

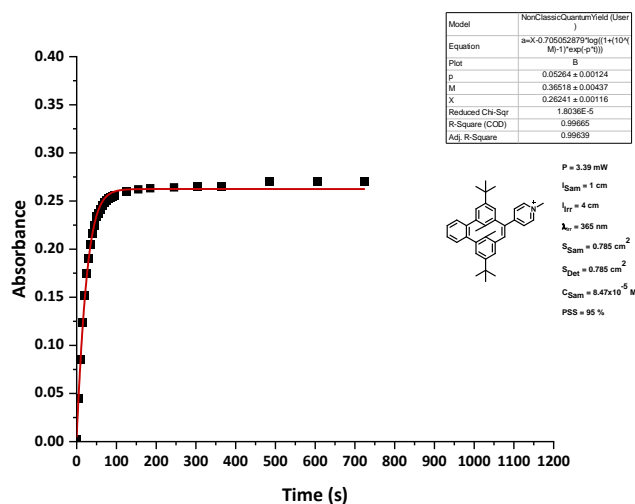

**Figure S33:** Evolution of the absorbance at  $\lambda = 660$  nm during an irradiation at  $\lambda_{ex} = 365$  nm of **BCPDPy<sup>+</sup>, PF<sub>6</sub><sup>-</sup>** in acetonitrile as function of time and its fit using Maafi and Brown photo-kinetic model.



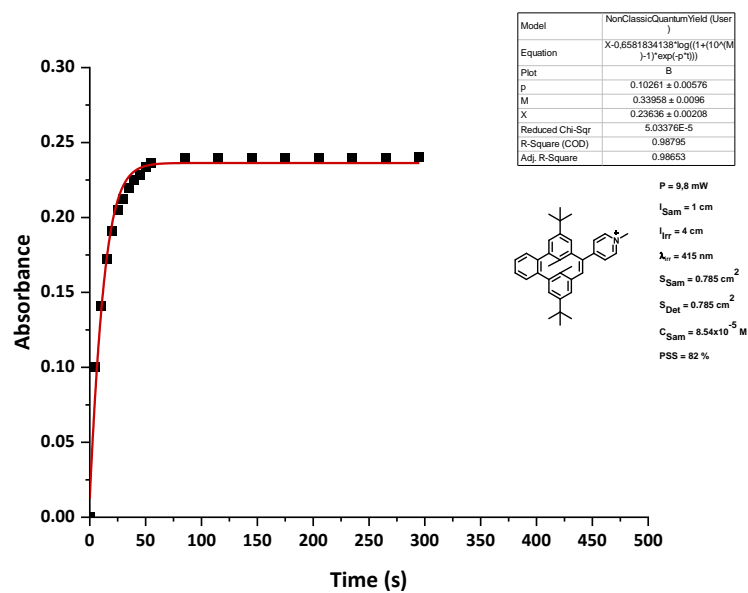

**Figure S34:** Evolution of the absorbance at  $\lambda = 660 \text{ nm}$  during an irradiation at  $\lambda_{\text{ex}} = 415 \text{ nm}$  of **BCPDpy<sup>+</sup>, PF<sub>6</sub><sup>-</sup>** in acetonitrile as function of time and its fit using Maafi and Brown photo-kinetic model.

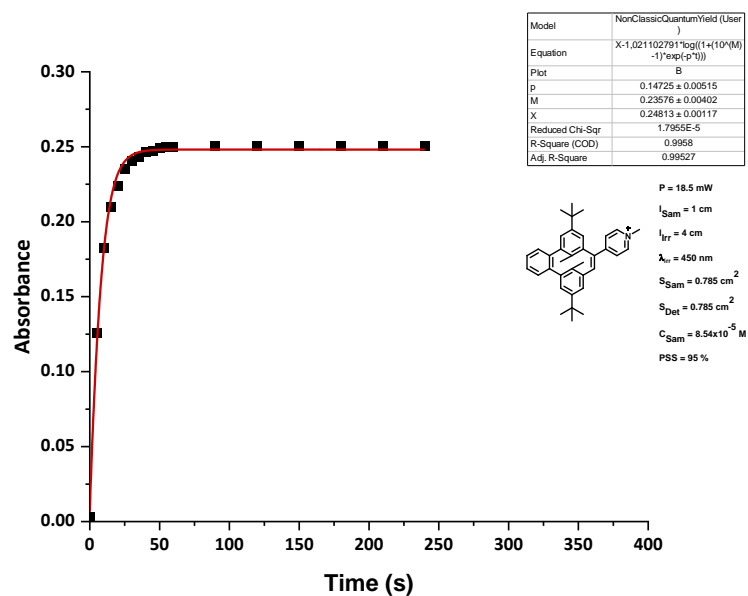

**Figure S35:** Evolution of the absorbance at  $\lambda = 660 \text{ nm}$  during an irradiation at  $\lambda_{\text{ex}} = 450 \text{ nm}$  of **BCPDpy<sup>+</sup>, PF<sub>6</sub><sup>-</sup>** in acetonitrile as function of time and its fit using Maafi and Brown photo-kinetic model.

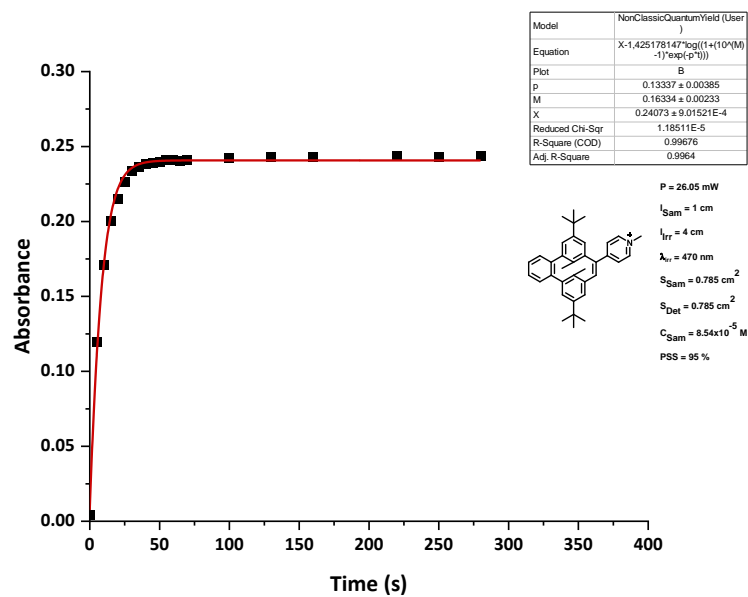

**Figure S36:** Evolution of the absorbance at  $\lambda = 660 \text{ nm}$  during an irradiation at  $\lambda_{\text{ex}} = 470 \text{ nm}$  of **BCPDpy<sup>+</sup>, PF<sub>6</sub><sup>-</sup>** in acetonitrile as function of time and its fit using Maafi and Brown photo-kinetic model.

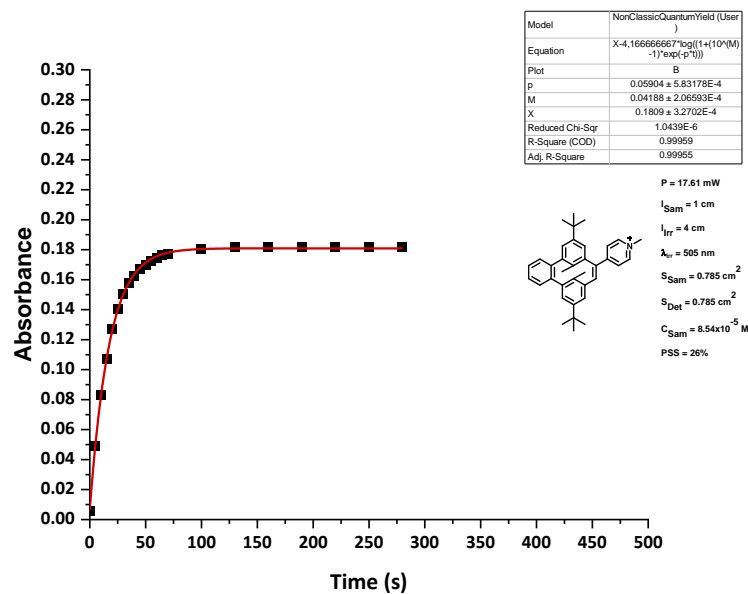

**Figure S37:** Evolution of the absorbance at  $\lambda = 660 \text{ nm}$  during an irradiation at  $\lambda_{\text{ex}} = 505 \text{ nm}$  of **BCPDpy<sup>+</sup>, PF<sub>6</sub><sup>-</sup>** in acetonitrile as function of time and its fit using Maafi and Brown photo-kinetic model.

C) Experimental study of the photo-opening process in water

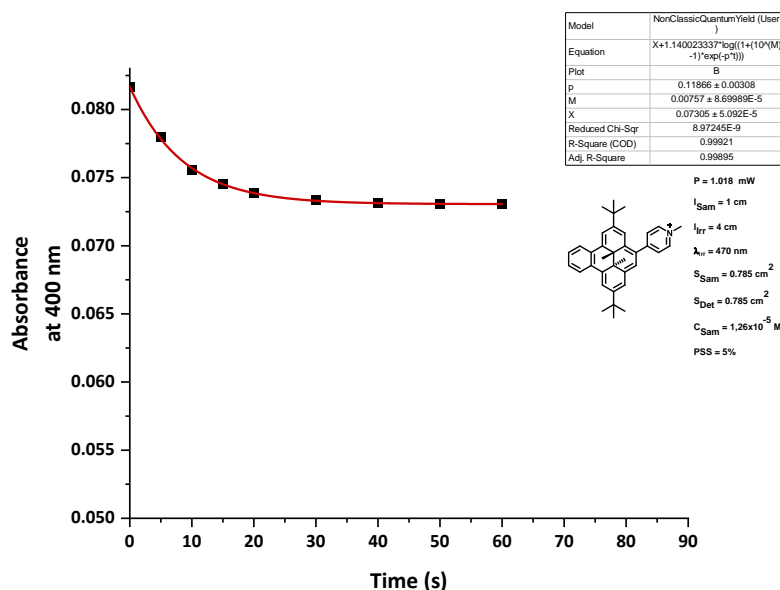

**Figure S38:** Evolution of the absorbance at  $\lambda = 400$  nm during an irradiation at  $\lambda_{ex} = 470$  nm of a solution of **BDHPPy<sup>+</sup>, I<sup>-</sup>** in water as function of time and its fit using Maafi and Brown photo-kinetic model.

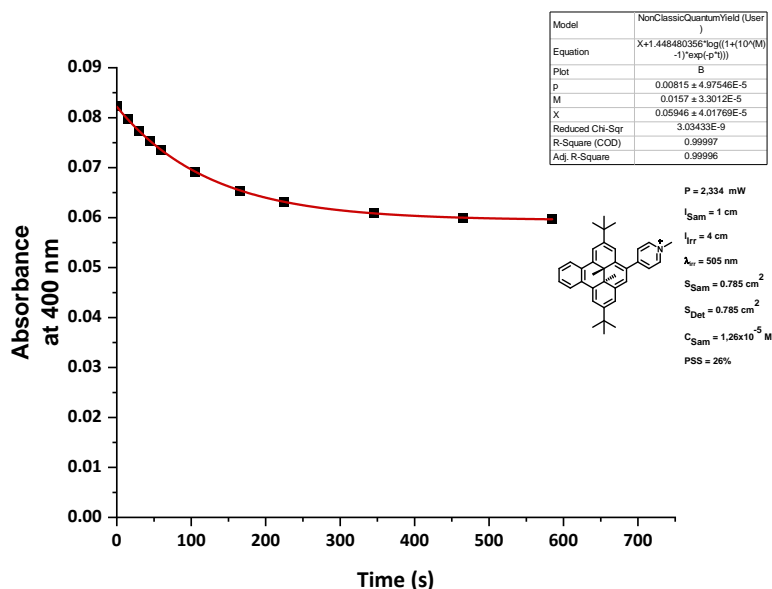

**Figure S39:** Evolution of the absorbance at  $\lambda = 400$  nm during an irradiation at  $\lambda_{ex} = 505$  nm of a solution of **BDHPPy<sup>+</sup>, I<sup>-</sup>** in water as function of time and its fit using Maafi and Brown photo-kinetic model.

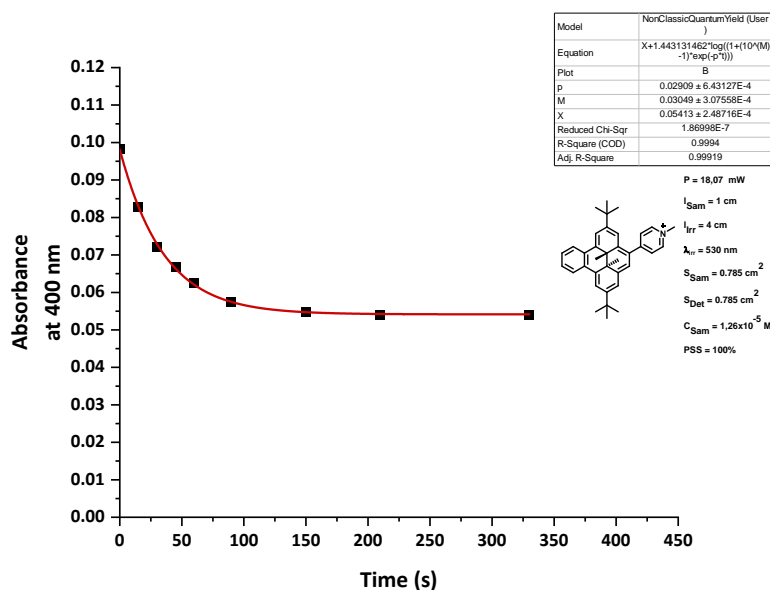

**Figure S40:** Evolution of the absorbance at  $\lambda = 400$  nm during an irradiation at  $\lambda_{ex} = 530$  nm of a solution of **BDHPPy<sup>+</sup>, I<sup>-</sup>** in water as function of time and its fit using Maafi and Brown photo-kinetic model.

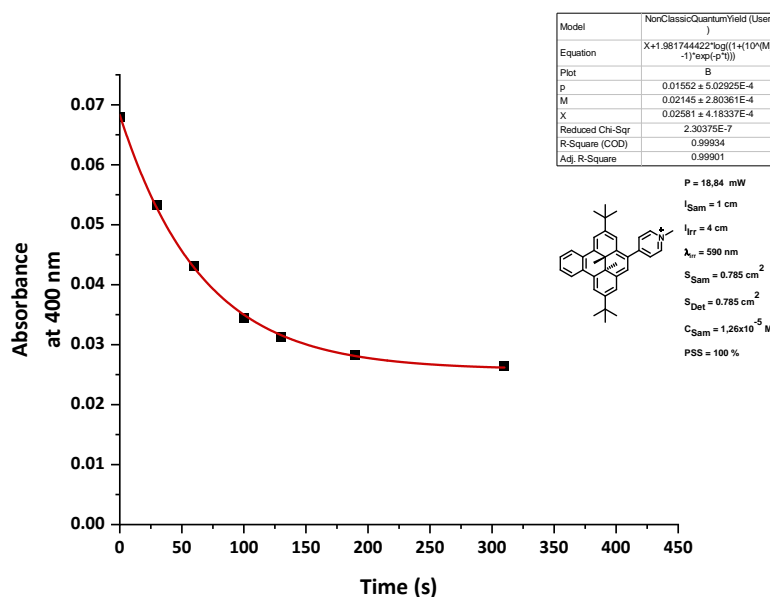

**Figure S41:** Evolution of the absorbance at  $\lambda = 400$  nm during an irradiation at  $\lambda_{ex} = 590$  nm of a solution of **BDHPPy<sup>+</sup>, I<sup>-</sup>** in water as function of time and its fit using Maafi and Brown photo-kinetic model.

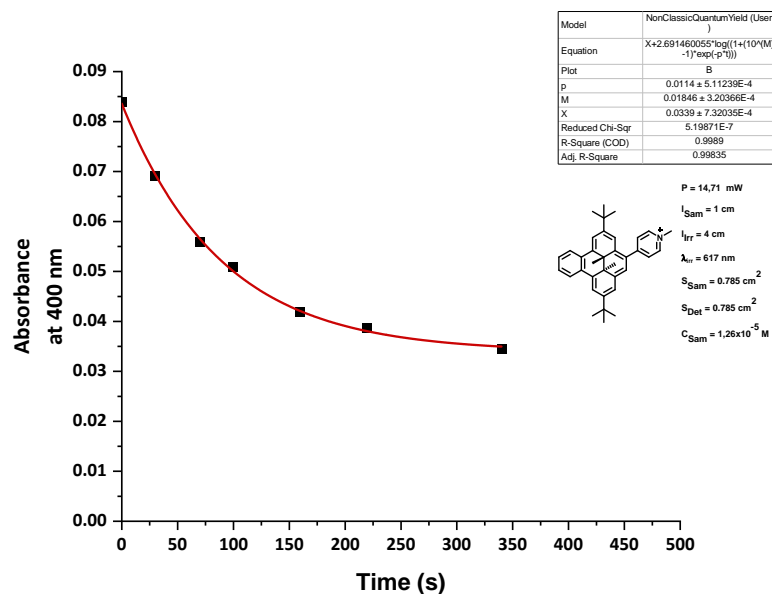

**Figure S42:** Evolution of the absorbance at  $\lambda = 400$  nm during an irradiation at  $\lambda_{ex} = 617$  nm of a solution of **BDHPPy<sup>+</sup>, I<sup>-</sup>** in water as function of time and its fit using Maafi and Brown photo-kinetic model.

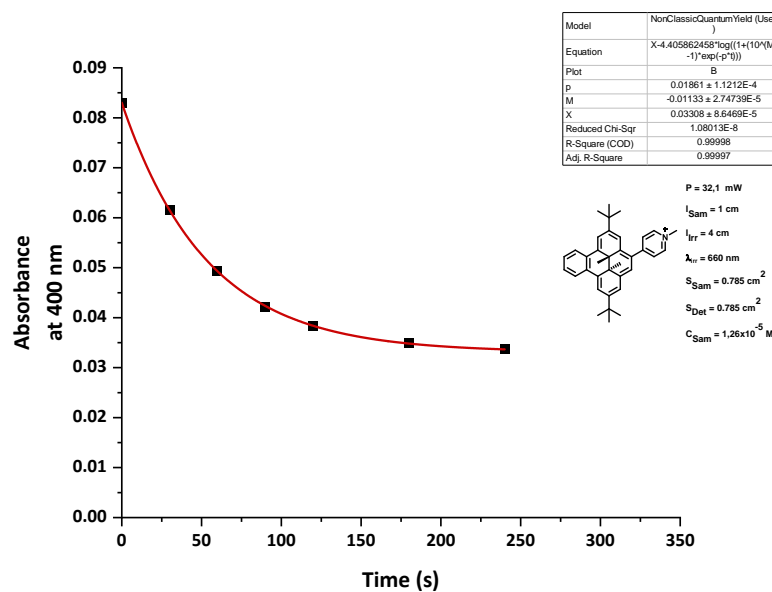

**Figure S43:** Evolution of the absorbance at  $\lambda = 400$  nm during an irradiation at  $\lambda_{ex} = 660$  nm of a solution of **BDHPPy<sup>+</sup>, I<sup>-</sup>** in water as function of time and its fit using Maafi and Brown photo-kinetic model.

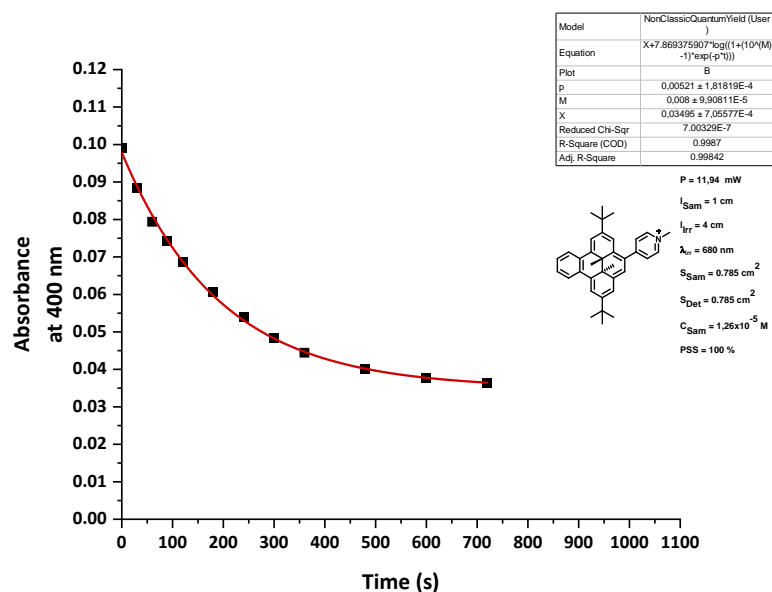

**Figure S44:** Evolution of the absorbance at  $\lambda = 400$  nm during an irradiation at  $\lambda_{ex} = 680$  nm of a solution of **BDHPPy<sup>+</sup>, I<sup>-</sup>** in water as function of time and its fit using Maafi and Brown photo-kinetic model.

#### D) Experimental study of the photo-closing process in water

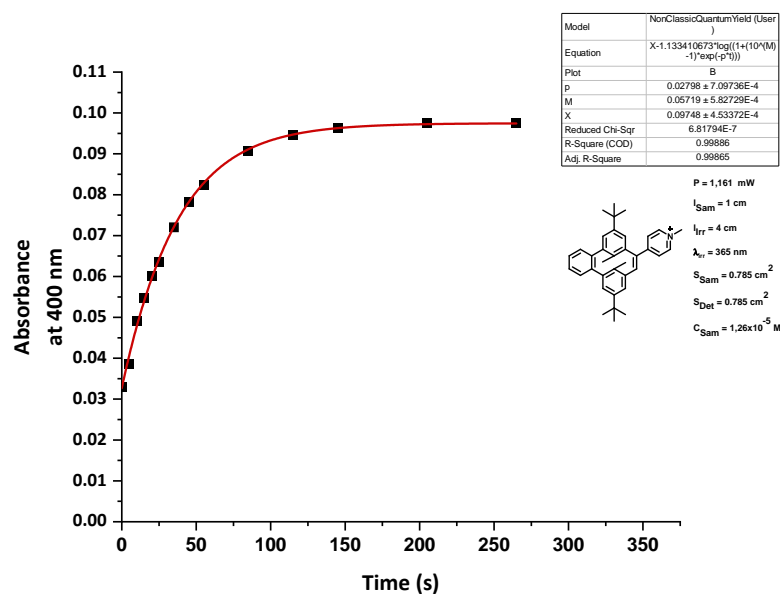

**Figure S45:** Evolution of the absorbance at  $\lambda = 400$  nm during an irradiation at  $\lambda_{ex} = 365$  nm of a solution of **BCPDPy<sup>+</sup>, I<sup>-</sup>** in water as function of time and its fit using Maafi and Brown photo-kinetic model.

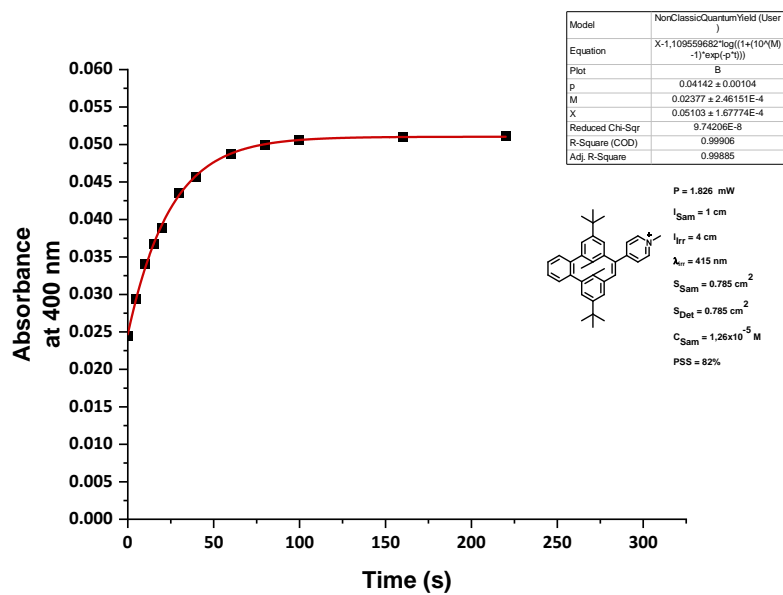

**Figure S46:** Evolution of the absorbance at  $\lambda = 400 \text{ nm}$  during an irradiation at  $\lambda_{\text{ex}} = 415 \text{ nm}$  of a solution of **BCPDPy<sup>+</sup> I<sup>-</sup>** in water as function of time and its fit using Maafi and Brown photo-kinetic model.

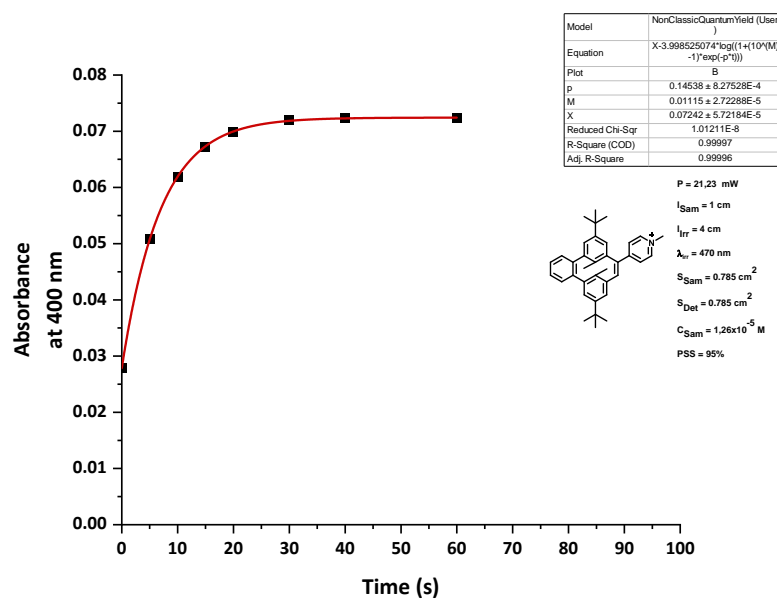

**Figure S47:** Evolution of the absorbance at  $\lambda = 400 \text{ nm}$  during an irradiation at  $\lambda_{\text{ex}} = 470 \text{ nm}$  of a solution of **BCPDPy<sup>+</sup> I<sup>-</sup>** in water as function of time and its fit using Maafi and Brown photo-kinetic model.

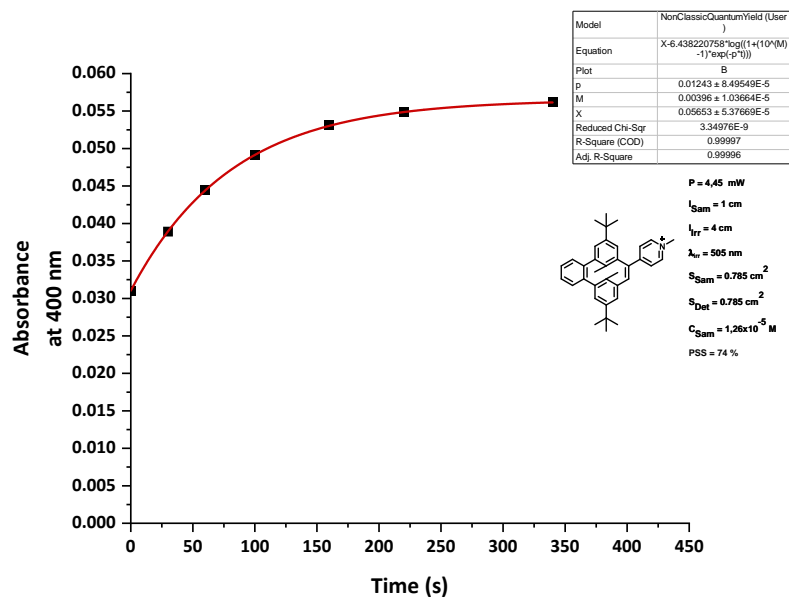

**Figure S48:** Evolution of the absorbance at  $\lambda = 400 \text{ nm}$  during an irradiation at  $\lambda_{\text{ex}} = 505 \text{ nm}$  of a solution of **BCPDPy<sup>+</sup> I<sup>-</sup>** in water as function of time and its fit using Maafi and Brown photo-kinetic model.



## 9. Cartesian coordinates for optimized structures

B3LYP/6-311G(d,p) **BDHP** optimized Cartesian coordinates in acetonitrile.

|   |                 |                 |                 |
|---|-----------------|-----------------|-----------------|
| C | 2.858948222421  | 0.057803587395  | -1.742081435292 |
| C | 3.552665609768  | 0.014079530971  | -0.550972670941 |
| C | 2.812218142304  | -0.036012143123 | 0.676768449249  |
| C | 1.450096547602  | 0.066286332874  | 0.748743347155  |
| C | 1.447886119456  | 0.096774923529  | -1.800008804065 |
| C | 0.692845855995  | 0.009148058961  | 1.989752669756  |
| C | -0.739214864856 | -0.019089556074 | 1.975391987918  |
| C | -1.471464727707 | -0.068987923528 | 0.717809236121  |
| C | -2.827925921524 | 0.040413788467  | 0.613807707594  |
| C | -3.545262080274 | -0.008018612823 | -0.632397097211 |
| C | -2.831034902595 | -0.058084505726 | -1.807526037440 |
| C | -1.415474710815 | -0.098253378302 | -1.830794532876 |
| C | -0.680737514618 | 0.000577945316  | -2.991564500733 |
| C | 0.737557104750  | 0.000513466594  | -2.977277281562 |
| C | 0.670016110195  | 0.386546807665  | -0.518310213345 |
| C | -0.665302618631 | -0.389281757388 | -0.533047572297 |
| C | 0.443189830844  | 1.939564662046  | -0.501255576298 |
| C | -0.438973841009 | -1.942178180347 | -0.511906940961 |
| H | 3.394299436356  | 0.002816227774  | -2.684847923916 |
| H | 3.370575617914  | -0.199591005143 | 1.586367883826  |
| H | -3.411034611671 | 0.207160999000  | 1.509907551589  |
| H | -3.340653254776 | -0.009182254369 | -2.762304462884 |
| H | -1.201607816091 | 0.060768984235  | -3.942590890113 |
| H | 1.278046463090  | -0.055768822419 | -3.917475113098 |
| H | -0.099697755477 | 2.253826488506  | 0.391639004188  |
| H | -0.113873722067 | 2.260595487257  | -1.382506605927 |
| H | 0.079231639866  | -2.258231696848 | 0.394878609673  |
| H | 0.142038492337  | -2.261760004060 | -1.378117490964 |
| H | 1.414659019052  | 2.436923790496  | -0.505364276376 |
| H | -1.409978081529 | -2.439513761891 | -0.543038769649 |
| C | -1.420302336645 | -0.042512378553 | 3.218680442795  |
| H | -2.501119668165 | -0.092745375332 | 3.229633791960  |
| C | 1.347567080990  | 0.023129237800  | 3.248144730315  |
| H | 2.427877600549  | 0.072257953713  | 3.282896654608  |
| C | -0.751922773487 | -0.030760082987 | 4.421584185151  |
| H | -1.307890627942 | -0.053506403912 | 5.351989852515  |
| C | 0.653716631811  | 0.003357573071  | 4.436205309887  |
| H | 1.190117587476  | 0.019246821790  | 5.378194246990  |
| C | 5.093273860883  | -0.057537667122 | -0.564715446083 |
| C | 5.545168412120  | -1.352853518149 | -1.280474279755 |
| C | 5.656520038789  | 1.167542162130  | -1.323063541579 |
| C | 5.704254653602  | -0.057333971584 | 0.849745727879  |
| H | 5.159439612004  | -2.237121503344 | -0.765792354523 |
| H | 5.194246349015  | -1.387300535099 | -2.314162564811 |
| H | 6.637784657176  | -1.416972781376 | -1.294809343211 |
| H | 5.360547656116  | 2.099130956106  | -0.832871830822 |
| H | 6.750040350211  | 1.128019745665  | -1.346637499096 |
| H | 5.301160034326  | 1.204935306425  | -2.354964022346 |
| H | 6.794766082979  | -0.069029227435 | 0.773739186839  |
| H | 5.421820315831  | 0.834883645284  | 1.415372077678  |
| H | 5.408664382052  | -0.938461959359 | 1.425567888527  |
| C | -5.079801663411 | 0.065026035440  | -0.591760434978 |
| C | -5.626786977447 | -1.121243188025 | 0.238368010713  |
| C | -5.522022264531 | 1.395667304397  | 0.063894429851  |
| C | -5.709081750939 | -0.006551809085 | -1.994783094838 |
| H | -5.343704893448 | -2.075491568832 | -0.214272555378 |
| H | -5.249175393087 | -1.112033452087 | 1.263277116571  |
| H | -6.719232834146 | -1.077489651028 | 0.285017514221  |
| H | -5.152997325608 | 2.251603716999  | -0.507513412301 |
| H | -6.614275633571 | 1.453549653231  | 0.097161466418  |
| H | -5.154742090801 | 1.492895229878  | 1.087919207578  |
| H | -6.798494734640 | 0.023767926594  | -1.908611807329 |
| H | -5.404940177603 | 0.836172108767  | -2.621186288866 |
| H | -5.442650918768 | -0.932425713027 | -2.511549005702 |

B3LYP/6-311G(d,p) **BDHPPy**<sup>+</sup> optimized Cartesian coordinates in acetonitrile.

|   |                 |                 |                 |
|---|-----------------|-----------------|-----------------|
| C | 2.258571533939  | -1.126987395651 | -0.054177902217 |
| C | -2.073908364637 | 2.560128054369  | -0.104350729805 |
| C | 2.012081161529  | -2.489245338715 | -0.116669639439 |
| C | -3.371542420967 | 2.114842468435  | -0.048098057682 |
| C | 0.666917813776  | -2.956148450822 | -0.051464076182 |
| C | -3.610814973695 | 0.697562212891  | 0.049330071270  |
| C | -0.407837200192 | -2.127358501444 | 0.124595384496  |
| C | -2.632079743931 | -0.248508255229 | -0.029725620443 |
| C | 1.245161559519  | -0.167043817275 | 0.111912502368  |
| C | -0.967970227039 | 1.668209258938  | -0.115558167958 |
| C | -1.783645475879 | -2.600613989197 | 0.136490648086  |
| C | -2.876076083525 | -1.679098440983 | 0.086627835550  |
| C | 0.324275527332  | 2.105583548189  | 0.005928843130  |
| C | 1.450702023244  | 1.220770908280  | 0.056863382962  |
| C | -0.178216753220 | -0.652347597247 | 0.410133170745  |
| C | -1.213370851288 | 0.189187101242  | -0.374861141451 |
| C | -0.342909036368 | -0.490016846046 | 1.963902640727  |
| C | -1.060097821773 | -0.010155833296 | -1.922907269812 |
| C | -4.193676080626 | -2.200303968129 | 0.116239523769  |
| C | -2.075250959662 | -3.985641373818 | 0.233440003496  |
| C | -4.441874102263 | -3.552050005083 | 0.204472431959  |
| C | -3.368028917349 | -4.457565987835 | 0.267474792312  |
| H | 3.269774372508  | -0.782072359193 | -0.220053344346 |
| H | -1.853967797389 | 3.620484701946  | -0.088024746481 |
| H | 0.494623235045  | -4.009690868461 | -0.207455960434 |
| H | -4.630215448125 | 0.384295393305  | 0.229225943865  |
| H | 0.500272226582  | 3.172159292248  | 0.097552036305  |
| H | -1.335121846631 | -0.806869541387 | 2.288224015755  |
| H | -1.252303123522 | -1.043908827917 | -2.214584095728 |
| H | -0.188649616576 | 0.546306164149  | 2.265696497244  |
| H | -0.056565416306 | 0.266183728534  | -2.252044981422 |
| H | 0.398197204865  | -1.112654057785 | 2.467841635015  |
| H | -1.779264195505 | 0.629843661423  | -2.436485382734 |
| H | -5.036126783439 | -1.525091411074 | 0.050939080004  |
| H | -1.264368058291 | -4.697431815467 | 0.309464508907  |
| H | -5.463091661629 | -3.914658155125 | 0.223087829505  |
| H | -3.554862290281 | -5.521936450975 | 0.349049890127  |
| C | 2.780804946124  | 1.836938904064  | 0.068682383723  |
| C | 3.058271066066  | 2.974802272194  | -0.718928221924 |
| C | 3.826114809730  | 1.395386931309  | 0.908106150179  |
| C | 4.288255588489  | 3.585075837449  | -0.671048999722 |
| H | 2.314814679108  | 3.375786851083  | -1.393379501924 |
| C | 5.036141382955  | 2.044393492519  | 0.927845739238  |
| H | 3.682328979696  | 0.566258593847  | 1.585342099166  |
| H | 4.532304534034  | 4.445074764954  | -1.278094891862 |
| H | 5.846660786457  | 1.738948028010  | 1.573832582833  |
| N | 5.266999954600  | 3.125275490134  | 0.143642104948  |
| C | 6.596187856505  | 3.771259549166  | 0.152371796164  |
| H | 7.008711621439  | 3.716864213100  | 1.157008337048  |
| H | 7.253380677877  | 3.256486461561  | -0.548520573304 |
| H | 6.486002529481  | 4.812280415824  | -0.139216683911 |
| C | 3.187456889926  | -3.460024671063 | -0.337565295050 |
| C | 3.847605226362  | -3.162493932172 | -1.706076084280 |
| C | 4.230587804165  | -3.264942854757 | 0.788668345386  |
| C | 2.751086187636  | -4.937442518385 | -0.327571538720 |
| H | 3.130268768494  | -3.291359163547 | -2.521130171830 |
| H | 4.239236714164  | -2.144248897239 | -1.757369722283 |
| H | 4.680925832083  | -3.850833472299 | -1.874703719748 |
| H | 3.790611766930  | -3.471884391285 | 1.768052201153  |
| H | 5.069417110016  | -3.951181286006 | 0.641108333700  |
| H | 4.631044150300  | -2.249238137858 | 0.805051777208  |
| H | 3.631953182737  | -5.572532310076 | -0.449342292283 |
| H | 2.271079988932  | -5.214539984596 | 0.614908688612  |
| H | 2.065511842114  | -5.170130577777 | -1.146464622789 |
| C | -4.580553954255 | 3.061210365831  | -0.014240768458 |
| C | -5.525028228802 | 2.722614568130  | -1.192991022502 |
| C | -5.343086379126 | 2.882473362753  | 1.321067107808  |
| C | -4.171103189571 | 4.539677873877  | -0.138137205865 |
| H | -5.015154340108 | 2.857355472300  | -2.150986741576 |
| H | -5.887274054800 | 1.693189265481  | -1.145277887129 |
| H | -6.396477730554 | 3.383641879555  | -1.175692011699 |
| H | -4.698784965945 | 3.121549897497  | 2.171582599709  |
| H | -6.206667933773 | 3.553331747705  | 1.349339332537  |
| H | -5.712422853675 | 1.863028464272  | 1.452629416401  |
| H | -5.066641944076 | 5.166229612789  | -0.134855964407 |
| H | -3.541749006730 | 4.859926430346  | 0.696407249189  |
| H | -3.632546843240 | 4.734365905517  | -1.069497955198 |

B3LYP/6-311G(d,p) BCPDpy<sup>+</sup> optimized Cartesian coordinates in acetonitrile.

|   |                 |                 |                 |
|---|-----------------|-----------------|-----------------|
| C | -0.861145220736 | -1.924312748360 | 1.013748721603  |
| C | 0.446640974659  | 3.231136113360  | -0.154707729900 |
| C | 0.136923530590  | -2.888127562130 | 1.216075094329  |
| C | 1.697377316534  | 3.541218811856  | -0.690199856158 |
| C | 1.392143194903  | -2.588044090976 | 0.687128657805  |
| C | 2.677651690937  | 2.545994030781  | -0.578261526328 |
| C | 1.609454463674  | -1.493091781944 | -0.168793454086 |
| C | 2.511840686205  | 1.400281364165  | 0.214244175995  |
| C | -0.678155420838 | -0.833294424651 | 0.159361790858  |
| C | 0.232967417130  | 2.063324338872  | 0.602738403927  |
| C | 3.031494057665  | -1.048656474749 | -0.362583542875 |
| C | 3.472693219243  | 0.263357881535  | 0.009199048357  |
| C | -1.159975020654 | 1.588674902958  | 0.642357082752  |
| C | -1.609530090566 | 0.337218083927  | 0.313926838903  |
| C | 0.506937669577  | -0.735517154227 | -0.606102151536 |
| C | 1.343396833061  | 1.276682163478  | 0.992558456033  |
| C | 0.579026978283  | 0.107266364769  | -1.854328944262 |
| C | 1.301464884232  | 0.429581063900  | 2.234617834732  |
| C | 4.849143086668  | 0.525110712386  | 0.012250148868  |
| C | 3.994630562249  | -1.988607236078 | -0.751193851129 |
| C | 5.786976689312  | -0.435064052077 | -0.359117143240 |
| C | 5.355879224471  | -1.694489665223 | -0.760657673302 |
| H | -1.789928284690 | -1.991830149458 | 1.569242566809  |
| H | -0.411282311921 | 3.854191127190  | -0.374409305552 |
| H | 2.251793944461  | -3.179843995425 | 0.972850572737  |
| H | 3.596547297061  | 2.638003182418  | -1.145351170708 |
| H | -1.905608825077 | 2.376194707864  | 0.705041056295  |
| H | 1.606758685795  | 0.285700177132  | -2.165886659957 |
| H | 2.057526711676  | -0.352641547377 | 2.234458349656  |
| H | 0.067640685735  | 1.064233497860  | -1.766839052110 |
| H | 0.325313769797  | -0.015204147145 | 2.419610564502  |
| H | 0.088530089719  | -0.447624090968 | -2.662716415106 |
| H | 1.518628455283  | 1.088740863166  | 3.083979557988  |
| H | 5.189527784763  | 1.508505765697  | 0.316154463685  |
| H | 3.662589323048  | -2.975622652082 | -1.052922534145 |
| H | 6.843674838243  | -0.194398953463 | -0.339185704881 |
| H | 6.069822210847  | -2.448349147144 | -1.071978914108 |
| C | -3.051854871337 | 0.116182325715  | 0.151240069987  |
| C | -4.031236740066 | 0.879900609196  | 0.820009379595  |
| C | -3.528625917788 | -0.892289811442 | -0.710617627580 |
| C | -5.368047241152 | 0.652149537491  | 0.601685659696  |
| H | -3.758197580767 | 1.641410510952  | 1.536375282781  |
| C | -4.876786429758 | -1.078403525230 | -0.898880353938 |
| H | -2.839566377792 | -1.526583857813 | -1.249928085054 |
| H | -6.140641805348 | 1.215929850885  | 1.104610210685  |
| H | -5.270371346712 | -1.832279064924 | -1.565330899321 |
| N | -5.786031677530 | -0.312365007394 | -0.251791145340 |
| C | -7.231122976858 | -0.571022613141 | -0.426659709416 |
| H | -7.402771396517 | -0.951211872413 | -1.430398516216 |
| H | -7.558240801239 | -1.304366497827 | 0.310314018222  |
| H | -7.775611513132 | 0.359843119376  | -0.291519446343 |
| C | -0.141051452866 | -4.129031628531 | 2.081103145744  |
| C | -0.530842573066 | -3.698678658342 | 3.514512116738  |
| C | -1.308324463207 | -4.926111119115 | 1.453077643387  |
| C | 1.082664414532  | -5.058730664950 | 2.172500333401  |
| H | 0.276873319381  | -3.130479287050 | 3.984079871197  |
| H | -1.430392023387 | -3.078811140208 | 3.523749828777  |
| H | -0.728711448723 | -4.580588306920 | 4.131123301162  |
| H | -1.055722566586 | -5.255653863742 | 0.441267808553  |
| H | -1.526908032235 | -5.813264008014 | 2.054974125369  |
| H | -2.220457463527 | -4.327343470794 | 1.394856702196  |
| H | 0.823294508055  | -5.946074845373 | 2.755796630573  |
| H | 1.411509208323  | -5.393300616127 | 1.184817486271  |
| H | 1.927580845677  | -4.574587584059 | 2.669484284264  |
| C | 1.984492172451  | 4.836767534184  | -1.468172279723 |
| C | 3.177946460209  | 5.565191903759  | -0.807010679870 |
| C | 2.339162398710  | 4.504832598246  | -2.936323646227 |
| C | 0.776905852311  | 5.791762965327  | -1.467279984514 |
| H | 2.950024232793  | 5.824913036568  | 0.230643687146  |
| H | 4.079121779524  | 4.947464173814  | -0.809753357327 |
| H | 3.402877353036  | 6.489553281068  | -1.347445019243 |
| H | 1.511735854920  | 3.987471730764  | -3.429842639590 |
| H | 2.543405249513  | 5.425485359169  | -3.491138065223 |
| H | 3.225599585856  | 3.870406226589  | -3.008206144504 |
| H | 1.041763686622  | 6.714618899866  | -1.989711591090 |
| H | -0.086132405997 | 5.359879030800  | -1.981257965177 |
| H | 0.473191582336  | 6.059481219803  | -0.451475626502 |

Broken-symmetry B3LYP/6-311G(d,p) transition state optimized Cartesian coordinates in acetonitrile for **BDHPPy<sup>+</sup>/BCPDPy<sup>+</sup>** thermal conversion.

|   |                 |                 |                 |
|---|-----------------|-----------------|-----------------|
| C | -0.960259443707 | -1.911373757234 | 0.951851236732  |
| C | 0.473820680010  | 3.323995143200  | -0.136069490336 |
| C | 0.018983676093  | -2.895199723138 | 1.198971101890  |
| C | 1.788021377988  | 3.658356493231  | -0.454020375561 |
| C | 1.342026078756  | -2.584592255928 | 0.819063157263  |
| C | 2.760102043459  | 2.621758586640  | -0.362884429382 |
| C | 1.676850119400  | -1.442430375074 | 0.113930502896  |
| C | 2.502150781019  | 1.386743422461  | 0.189701642489  |
| C | -0.696429983570 | -0.755084338827 | 0.238453484957  |
| C | 0.121802997148  | 2.059580845675  | 0.359082158939  |
| C | 3.101792161697  | -1.060026072647 | -0.049113710789 |
| C | 3.508655415638  | 0.296595838822  | 0.122663659769  |
| C | -1.251946193173 | 1.659780600879  | 0.323268132948  |
| C | -1.689953200512 | 0.354159679296  | 0.194228589482  |
| C | 0.640423364907  | -0.502121331402 | -0.296712551873 |
| C | 1.169824941734  | 1.096419383008  | 0.722867275661  |
| C | 0.704009509072  | -0.032810366607 | -1.752143534784 |
| C | 1.135406400963  | 0.636887311632  | 2.181137227981  |
| C | 4.879776940843  | 0.584487727517  | 0.143219237672  |
| C | 4.082384806976  | -2.034146819501 | -0.272910835046 |
| C | 5.839933460126  | -0.405224120848 | -0.054262982295 |
| C | 5.439156767143  | -1.718025293116 | -0.282290352641 |
| H | -1.955788592965 | -2.046536898038 | 1.353950520668  |
| H | -0.327849607882 | 4.027144418167  | -0.325898966510 |
| H | 2.143636867753  | -3.246337789132 | 1.125322392742  |
| H | 3.747742557370  | 2.805455712404  | -0.767944406489 |
| H | -1.975640522848 | 2.460038781368  | 0.209540412919  |
| H | 1.712095025905  | 0.269195394826  | -2.035176348887 |
| H | 1.858648278420  | -0.155459664211 | 2.373539226252  |
| H | 0.024393065954  | 0.797686350566  | -1.941847829422 |
| H | 0.143502383464  | 0.289347507416  | 2.471004343315  |
| H | 0.408872568190  | -0.864885805393 | -2.398355223591 |
| H | 1.392665104904  | 1.489275061952  | 2.817286222707  |
| H | 5.203108625728  | 1.601106916381  | 0.331785254356  |
| H | 3.775220417078  | -3.057915673517 | -0.451604759214 |
| H | 6.892357344396  | -0.147409815487 | -0.031695053664 |
| H | 6.173765327930  | -2.495073166534 | -0.458682810217 |
| C | -3.099504268921 | 0.085500981390  | -0.021574540621 |
| C | -4.121040591301 | 0.956757273777  | 0.433950486025  |
| C | -3.540832072759 | -1.060311463168 | -0.728718770954 |
| C | -5.440543708305 | 0.692044293113  | 0.178701906167  |
| H | -3.886945370872 | 1.835213407599  | 1.018021629474  |
| C | -4.873703280965 | -1.275177058707 | -0.965250439908 |
| H | -2.830447932510 | -1.774517673250 | -1.119014073621 |
| H | -6.236562825647 | 1.334627305772  | 0.526361489354  |
| H | -5.231959066346 | -2.130241924853 | -1.520545317387 |
| N | -5.819603473140 | -0.410229677042 | -0.518043700657 |
| C | -7.250698561712 | -0.700343551728 | -0.728553569127 |
| H | -7.628167341942 | -1.303415873801 | 0.097820600140  |
| H | -7.798710942380 | 0.237328032496  | -0.781628871181 |
| H | -7.368687413270 | -1.241617000603 | -1.664211193108 |
| C | -0.282761093393 | -4.211684942053 | 1.926849035559  |
| C | 0.485519225392  | -4.252831340089 | 3.270345648452  |
| C | -1.783477696193 | -4.385340952969 | 2.224601647496  |
| C | 0.173581324229  | -5.397207520404 | 1.042499294584  |
| H | 1.565964402787  | -4.186240464466 | 3.124073794805  |
| H | 0.179917941045  | -3.427484396346 | 3.919245572625  |
| H | 0.276566143952  | -5.191330070961 | 3.792438873372  |
| H | -2.383971299643 | -4.361551546612 | 1.311062661130  |
| H | -1.948490848296 | -5.352765854637 | 2.705586209750  |
| H | -2.158015223339 | -3.614064629613 | 2.902870171494  |
| H | -0.027389061205 | -6.344020009057 | 1.552336655227  |
| H | -0.364117816411 | -5.402754362972 | 0.090278953061  |
| H | 1.243411011939  | -5.355333689789 | 0.826023409912  |
| C | 2.200626703134  | 5.039196370587  | -0.979052928338 |
| C | 3.319529709823  | 5.610716284434  | -0.074856578109 |
| C | 2.731225952788  | 4.910336039790  | -2.427557664588 |
| C | 1.027863508911  | 6.036402720087  | -0.981185295250 |
| H | 2.967788934673  | 5.726867857810  | 0.953994989352  |
| H | 4.200912228692  | 4.965563569019  | -0.060080897731 |
| H | 3.630981658798  | 6.593300357175  | -0.441135922094 |
| H | 1.959281767247  | 4.510833347682  | -3.090965324598 |
| H | 3.028894547649  | 5.893129044996  | -2.804770678398 |
| H | 3.602281298650  | 4.253896873146  | -2.487289826319 |
| H | 1.381031778793  | 7.012093225147  | -1.324318980955 |
| H | 0.225763310969  | 5.722233316291  | -1.654315962392 |
| H | 0.606275173670  | 6.168041734003  | 0.019094996420  |

SF-TD-BHLLYP/6-311G(d,p) model **BDHPPy<sup>+</sup>** optimized Cartesian coordinates.

C 2.0831328212 -0.3234879087 -1.0813999709  
C -3.3165430797 0.1393011259 0.5972121479  
C 3.0333532832 -0.4978397955 -0.1266621516  
C -3.5780424386 0.2427278973 1.9111743956  
C 2.7515017594 -0.4027373566 1.2584135125  
C -2.5293654647 0.2418577290 2.8910202946  
C 1.5170106170 -0.0862237891 1.7079272204  
C -1.2451575403 0.0135305176 2.5684612371  
C 0.7514227506 -0.0115782944 -0.7390350009  
C -1.9713738796 0.0026152053 0.1363817199  
C 1.1821626280 -0.0328023572 3.1229135036  
C -0.1612998528 0.0111131688 3.5432742609  
C -1.6505255891 0.1120363906 -1.1666859541  
C -0.2950220141 0.0379778327 -1.6464948649  
C 0.4344508128 0.3024763773 0.7221071135  
C -0.8937231222 -0.3600661343 1.1387333994  
C 0.3553605519 1.8576191555 0.7859919321  
C -0.7900559042 -1.9102912098 1.1107020186  
C -0.4289723550 0.0297421731 4.9201563717  
C 2.1958791596 -0.0060002953 4.0955776907  
C 0.5771878830 0.0401985586 5.8485590295  
C 1.9064865599 0.0317483916 5.4323069168  
H 2.3447648274 -0.5238340789 -2.1030285042  
H -4.1079370911 0.2122110498 -0.1292829525  
H 3.5398568211 -0.6518953921 1.9430158947  
H -2.8096135984 0.4613878803 3.9042722161  
H 4.0284624775 -0.7791770375 -0.4257539663  
H -4.5902317403 0.3813983748 2.2489233924  
H -2.4380084126 0.3059610507 -1.8746022427  
H 0.1161178017 2.1916186045 1.7879212577  
H -0.0638812837 -2.2722140701 1.8287055773  
H -0.3974731619 2.2352703997 0.1057461278  
H -0.5085296301 -2.2603901759 0.1238084544  
H 1.3167024016 2.2756679740 0.5100320847  
H -1.7547779074 -2.3350345904 1.3617444679  
H -1.4452198059 0.0181817238 5.2654691699  
H 3.2253929774 0.0109874616 3.7917698085  
H 0.3387916337 0.0545767824 6.8974524778  
H 2.7020597494 0.0569687185 6.1556048433  
C -0.1100325181 0.0283240300 -3.0830942606  
C -1.0390379898 -0.6112763718 -3.9264994362  
C 0.9323631564 0.7128884208 -3.7370830355  
C -0.8975352479 -0.5790690116 -5.2793988448  
H -1.8616450485 -1.1616952301 -3.5121081269  
C 1.0178713630 0.7245691421 -5.0949875543  
H 1.6494106640 1.2808891336 -3.1773055527  
H -1.5813226378 -1.0812097966 -5.9379126855  
H 1.7908655040 1.2602397841 -5.6135165880  
N 0.1183570840 0.0821132777 -5.8654141725  
C 0.2698178225 0.0653704472 -7.3222488510  
H 0.7414140363 0.9840387818 -7.6410536148  
H 0.8767369566 -0.7803922583 -7.6228513131  
H -0.7062314595 -0.0052526261 -7.7803155535

SF-TD-BHLLYP/6-311G(d,p) model **BDHPPy**<sup>+</sup>\* S<sub>1</sub> optimized Cartesian coordinates.

C 1.9821133422 -0.5560614411 -1.0823336215  
C -3.2814385032 0.1331207144 0.6161106402  
C 2.9640190181 -0.7329415537 -0.1357921436  
C -3.5742018752 0.2209185504 1.9820349381  
C 2.7205503025 -0.5431792780 1.2379641432  
C -2.5589916668 0.2025145524 2.9299375616  
C 1.5083577700 -0.1342349025 1.6899166463  
C -1.2392500237 -0.0022843437 2.5900737562  
C 0.7040269069 -0.1563029660 -0.7251325724  
C -1.9971859147 -0.0727363829 0.1882977749  
C 1.1935384859 0.0032103171 3.1065096360  
C -0.1517437395 0.0585697825 3.5444191958  
C -1.6627723411 -0.0104042612 -1.1763663384  
C -0.3681526372 -0.0663635773 -1.6616283146  
C 0.4236478266 0.2339511516 0.7118257375  
C -0.9107318408 -0.4101308451 1.1770234523  
C 0.3313708491 1.7888158124 0.7342068826  
C -0.7854455470 -1.9639115864 1.1849851541  
C -0.3972115622 0.1669061969 4.9200876027  
C 2.2150228772 0.0962637741 4.0548100364  
C 0.6263875414 0.2393794001 5.8333688869  
C 1.9443769179 0.2122578755 5.3984875850  
H 2.1988908920 -0.7993053272 -2.1057384318  
H -4.0662174226 0.2826279661 -0.1061941829  
H 3.5067895675 -0.7906330124 1.9265187446  
H -2.8301211700 0.3917694219 3.9515943646  
H 3.9320743163 -1.0870628926 -0.4439376692  
H -4.5887312227 0.3820422369 2.2985680528  
H -2.4716232674 0.1318552868 -1.8735967064  
H 0.1204705106 2.1491777106 1.7333709489  
H -0.0280365845 -2.2890052377 1.8883756058  
H -0.4501464488 2.1310147081 0.0664698792  
H -0.5246064286 -2.3318130099 0.1996631920  
H 1.2744253773 2.2140908006 0.4110435459  
H -1.7334755346 -2.3990651244 1.4769400115  
H -1.4062723727 0.1812062299 5.2853181626  
H 3.2396458668 0.1058631454 3.7332208455  
H 0.4027614526 0.3201299956 6.8822307320  
H 2.7519477959 0.2874095107 6.1046371532  
C -0.1552046358 0.0025846365 -3.1021221049  
C -1.0231423764 -0.6498920793 -4.0081794533  
C 0.8790559613 0.7647729679 -3.6904755956  
C -0.8533014878 -0.5416633526 -5.3483309614  
H -1.8217594843 -1.2722938751 -3.6489015066  
C 1.0069968905 0.8552478141 -5.0372040702  
H 1.5649049018 1.3213711037 -3.0798228087  
H -1.4913549269 -1.0439138196 -6.0503835714  
H 1.7713950330 1.4478768276 -5.5025629342  
N 0.1499952378 0.2113352166 -5.8802104880  
C 0.3594013596 0.2503004741 -7.3185125430  
H 0.8115356554 1.1945916515 -7.5906083059  
H 1.0064031564 -0.5612391405 -7.6379518137  
H -0.5936114682 0.1664019572 -7.8233813909

SF-TD-BHLLYP/6-311G(d,p) S<sub>0</sub>/S<sub>1</sub> MECI optimized Cartesian coordinates for model  
**BDHPPy<sup>+</sup>/BCDPy<sup>+</sup>** photochemical conversion.

C -1.0389010459 1.9066213225 0.9230284056  
C -0.4097097814 -3.2862462804 -0.5688644930  
C -1.1206360349 2.8862739923 -0.0686960208  
C -0.0498377391 -3.5863892899 -1.8384347183  
C -0.6134177590 2.6604315297 -1.3358874662  
C 0.1597386254 -2.5371308181 -2.7780804774  
C 0.0485532523 1.4861983041 -1.6273637729  
C -0.1578220153 -1.2485167219 -2.5174004711  
C -0.3484489053 0.7460910977 0.7057380421  
C -0.6474527758 -1.9451843269 -0.1705874693  
C 0.3775478053 1.1495352210 -3.0185113978  
C 0.1471051786 -0.1643695074 -3.4762994122  
C -0.5974686840 -1.6304818848 1.1749840810  
C -0.3417930023 -0.3554000048 1.6996350342  
C 0.2553736042 0.4838115130 -0.5973808140  
C -0.7660918784 -0.8979155363 -1.2137345611  
C 1.6840790991 -0.0666742149 -0.5367130816  
C -2.1970976261 -0.3884084411 -1.3583589903  
C 0.2686774528 -0.4132018137 -4.8352400836  
C 0.7939049644 2.1270828381 -3.9117177093  
C 0.6749968533 0.5742261362 -5.7176581327  
C 0.9593566530 1.8429001700 -5.2552654062  
H -1.5284547935 2.0705018579 1.8665238409  
H -0.4530613553 -4.0568123385 0.1824488170  
H -0.7813674678 3.3848027396 -2.1122989461  
H 0.5987862124 -2.7917421082 -3.7265049681  
H -1.6381584800 3.8065965165 0.1387598988  
H 0.1562668078 -4.6009314580 -2.1261068638  
H -0.6017711987 -2.4680535134 1.8509239503  
H 2.0456805950 -0.3183824838 -1.5237879149  
H -2.2776222935 0.3954941839 -2.1007102937  
H 1.7359745528 -0.9460567119 0.0895834646  
H -2.5943034108 -0.0376885616 -0.4140531453  
H 2.3371033369 0.6935599383 -0.1201719219  
H -2.8093723779 -1.2223595535 -1.6869370813  
H 0.0275886625 -1.3870687810 -5.2205938391  
H 1.0063364431 3.1177612171 -3.5497365841  
H 0.7642052846 0.3462717391 -6.7651351621  
H 1.2901368498 2.6104137403 -5.9318181555  
C -0.0684515698 -0.1517331090 3.0581325967  
C -0.3109330852 -1.1373093734 4.0665067664  
C 0.5050273559 1.0566039082 3.5600179094  
C -0.0094500289 -0.9128272129 5.3618785703  
H -0.7669859337 -2.0770491057 3.8252549813  
C 0.7952783440 1.2132841860 4.8703398525  
H 0.7486394141 1.8612963946 2.8946143282  
H -0.2057245497 -1.6455164768 6.1226640214  
H 1.2459857834 2.1137347026 5.2445861717  
N 0.5489363353 0.2479485440 5.7871488700  
C 0.7872087035 0.4788930339 7.2060698077  
H 1.5667465749 1.2192028970 7.3208793593  
H -0.1148493981 0.8297316632 7.6959624158  
H 1.1147508665 -0.4409937409 7.6717249694

SF-TD-BHLYP/6-311G(d,p) model **BCPDpy**<sup>+</sup> optimized Cartesian coordinates.

```
C -0.9423435496 1.9456176987 0.9225215218
C 0.0182222672 -3.1898672369 -0.4854955593
C -1.1167543061 2.8985665854 -0.0624756862
C 0.5310928528 -3.4590099647 -1.7386086177
C -0.6222778524 2.6376611929 -1.3244252544
C 0.4576946227 -2.4730424204 -2.7019865885
C 0.1911385056 1.5330146055 -1.5711163597
C -0.2935049336 -1.3095393702 -2.5087565109
C -0.1223422456 0.8440772730 0.7031579836
C -0.6922329546 -2.0109905140 -0.2526893370
C 0.3579193691 1.1080301789 -2.9956924123
C -0.0645657322 -0.1693840258 -3.4497792460
C -0.6758584632 -1.5589765019 1.1358322247
C -0.2938986798 -0.3365622025 1.6050761805
C 0.6122681364 0.7511705776 -0.4897414428
C -1.0497954513 -1.1910021588 -1.3442780469
C 1.8163479182 -0.1369191795 -0.6040348519
C -2.2470545332 -0.2976488704 -1.2683264357
C -0.0931144510 -0.4079071113 -4.8179628648
C 0.7670133990 2.0439516405 -3.9367038030
C 0.3001718363 0.5476921206 -5.7365141135
C 0.7508213018 1.7737716536 -5.2926336688
H -1.4932961305 2.0271175956 1.8445860818
H 0.2304250439 -3.8520699257 0.3371281964
H -0.9110038248 3.2654431139 -2.1492941607
H 1.0085598763 -2.5859738572 -3.6194952158
H -1.7278433102 3.7651118816 0.1161323734
H 1.0697163405 -4.3698299833 -1.9274575510
H -0.7370924976 -2.3568467740 1.8593599380
H 2.0998641743 -0.2995016105 -1.6336843382
H -2.2359870304 0.4791085241 -2.0180343871
H 1.7002524191 -1.0962875442 -0.1199273663
H -2.3915523956 0.1472218746 -0.2938438846
H 2.6495409250 0.3717934843 -0.1227143246
H -3.1164916943 -0.9222011044 -1.4656383978
H -0.4349401456 -1.3664498390 -5.1685649836
H 1.1064582539 3.0062606955 -3.5939586333
H 0.2597475317 0.3286000517 -6.7889232204
H 1.0800643264 2.5211248345 -5.9928530499
C -0.0815894612 -0.1646860434 3.0312177985
C -0.6950019941 -0.9633825289 4.0134254861
C 0.7767254870 0.8401819911 3.5089947257
C -0.4263714302 -0.7726566462 5.3342676280
H -1.4084456858 -1.7198573328 3.7496098354
C 1.0141911910 0.9816482621 4.8422288951
H 1.2671516898 1.5025162581 2.8219957766
H -0.8886858566 -1.3650110158 6.1014879798
H 1.6814932630 1.7293718729 5.2280108108
N 0.4239523994 0.1828646180 5.7501122559
C 0.6513125885 0.3977868146 7.1824974628
H 1.6519729958 0.7780949928 7.3292619424
H -0.0702054600 1.1069117621 7.5698404915
H 0.5529337747 -0.5442823726 7.7022215237
```



TD- $\omega$ B97X-D/6-311G(d,p) model **BDHPPy**\* S<sub>1</sub> optimized Cartesian coordinates.

|   |                 |                 |                 |
|---|-----------------|-----------------|-----------------|
| C | 1.928662321211  | -0.832585084641 | -1.039200721623 |
| C | -3.317359431242 | -0.003392628842 | 0.626897030003  |
| C | 2.928875276377  | -0.987420129515 | -0.083287932506 |
| C | -3.570953113658 | 0.250149635488  | 1.947355885636  |
| C | 2.698774422669  | -0.637252132409 | 1.252593730864  |
| C | -2.515709222994 | 0.300924269534  | 2.896387505969  |
| C | 1.507849623977  | -0.085186941105 | 1.655343269713  |
| C | -1.235544536018 | -0.033519584625 | 2.572662885691  |
| C | 0.705506238163  | -0.273419457215 | -0.725609342972 |
| C | -2.006697347668 | -0.275714388930 | 0.186987465647  |
| C | 1.211471995834  | 0.142985964582  | 3.072551545886  |
| C | -0.125969323360 | 0.074900419995  | 3.535161638948  |
| C | -1.703068462633 | -0.261124725024 | -1.172717146623 |
| C | -0.395099074812 | -0.219815436052 | -1.678669096090 |
| C | 0.428899397206  | 0.214895989883  | 0.668441639012  |
| C | -0.918358049152 | -0.521752521020 | 1.189526262318  |
| C | 0.174645901535  | 1.747417822326  | 0.640316000823  |
| C | -0.654225785405 | -2.050728491791 | 1.255536237875  |
| C | -0.362177316099 | 0.144130961988  | 4.909749101790  |
| C | 2.235731761390  | 0.375258873115  | 3.994862165776  |
| C | 0.671285858804  | 0.343178126750  | 5.813292251860  |
| C | 1.973368762446  | 0.480990237619  | 5.351984798590  |
| H | 2.103967017846  | -1.208487019428 | -2.041307411256 |
| H | -4.115271205096 | 0.062585674835  | -0.105031638776 |
| H | 3.462928977934  | -0.862031077960 | 1.987004408218  |
| H | -2.753300004989 | 0.639756771864  | 3.897036190538  |
| H | 3.871968245735  | -1.441788494678 | -0.361561488175 |
| H | -4.578642577945 | 0.481342003346  | 2.270901114470  |
| H | -2.537981096516 | -0.143270241266 | -1.855925783182 |
| H | -0.062194466626 | 2.118338604639  | 1.639049864299  |
| H | 0.149793953635  | -2.271316811664 | 1.960579239007  |
| H | -0.654933406318 | 1.986091976997  | -0.028135412113 |
| H | -0.375469804213 | -2.428939497061 | 0.269952660571  |
| H | 1.071894244063  | 2.258245548499  | 0.285975113621  |
| H | -1.560084755007 | -2.562514749449 | 1.585285529319  |
| H | -1.368360943945 | 0.020517357304  | 5.290068563080  |
| H | 3.253170449232  | 0.496271427851  | 3.643281586119  |
| H | 0.457413691228  | 0.393577949370  | 6.873916831301  |
| H | 2.784571499756  | 0.663085118450  | 6.046363802456  |
| C | -0.189127548893 | -0.052109284355 | -3.083239506718 |
| C | -1.142080401471 | -0.473372884618 | -4.053338375726 |
| C | 0.969630001448  | 0.579912121921  | -3.617334016563 |
| C | -0.935968967603 | -0.268698194445 | -5.382965368354 |
| H | -2.037130340320 | -1.003347407416 | -3.758591807771 |
| C | 1.117058768167  | 0.768862911165  | -4.957340006163 |
| H | 1.736729596408  | 0.962582100673  | -2.958505153614 |
| H | -1.641551660940 | -0.601601090654 | -6.132670679297 |
| H | 1.978881332829  | 1.271942071655  | -5.375755675919 |
| N | 0.180019498385  | 0.351116614669  | -5.847375112754 |
| C | 0.404763280369  | 0.494046146133  | -7.287836372207 |
| H | 1.016043630907  | 1.376230442161  | -7.470805579789 |
| H | 0.910704862353  | -0.389278819093 | -7.681838400183 |
| H | -0.551976436986 | 0.622469730439  | -7.791378951026 |

TD- $\omega$ B97X-D/6-311G(d,p)  $S_1$  transition state optimized Cartesian coordinates for  
**BDHPPy<sup>+</sup>/BCDPy<sup>+</sup>** photochemical conversion.

|   |                 |                 |                 |
|---|-----------------|-----------------|-----------------|
| C | 0.982859225977  | 1.910086507375  | 0.970885608728  |
| C | -0.592564546824 | -3.310963853041 | 0.268668592410  |
| C | 0.006429711115  | 2.906832739001  | 1.079799755341  |
| C | -1.889198284276 | -3.587969370214 | -0.056199115427 |
| C | -1.292601325090 | 2.677117308946  | 0.629624610413  |
| C | -2.834334203489 | -2.535260646706 | -0.201850895554 |
| C | -1.636585171916 | 1.490284475953  | 0.019012308108  |
| C | -2.541870059950 | -1.247493309197 | 0.126449759346  |
| C | 0.718110337996  | 0.718060225006  | 0.342542378788  |
| C | -0.175184366244 | -1.984030252663 | 0.523263575761  |
| C | -3.042176625211 | 1.176824451795  | -0.274200721986 |
| C | -3.506642378639 | -0.148886287378 | -0.096744330915 |
| C | 1.185913550353  | -1.678012335591 | 0.503577411563  |
| C | 1.698535213412  | -0.387564534061 | 0.324123402093  |
| C | -0.632438941555 | 0.431883393882  | -0.203548456964 |
| C | -1.195520176124 | -0.904334936153 | 0.673625301776  |
| C | -0.573960258485 | 0.012785586808  | -1.691294468197 |
| C | -1.309693314030 | -0.490361653556 | 2.156511549754  |
| C | -4.876079302667 | -0.389210700457 | -0.188957948532 |
| C | -3.945120823488 | 2.176965283849  | -0.632239246167 |
| C | -5.767812644625 | 0.623448521612  | -0.521574122110 |
| C | -5.299956965027 | 1.905190295943  | -0.767349845398 |
| H | 1.960522834110  | 2.079367265561  | 1.408819462289  |
| H | 0.150730727641  | -4.101276409681 | 0.271700700803  |
| H | -2.054108466618 | 3.427005316017  | 0.808701942611  |
| H | -3.810816637173 | -2.781226718869 | -0.601544892368 |
| H | 0.248272370873  | 3.844641998409  | 1.565181271604  |
| H | -2.192481590090 | -4.604315082272 | -0.274571174034 |
| H | 1.864708197126  | -2.523721971258 | 0.462724481773  |
| H | -0.185490170376 | 0.842694812308  | -2.285058928602 |
| H | -2.032594662452 | 0.317275671643  | 2.285116468482  |
| H | -1.568391914659 | -0.239320513875 | -2.060842649902 |
| H | -0.340980761885 | -0.170394748568 | 2.544645986926  |
| H | 0.078556682228  | -0.850981717684 | -1.824254044732 |
| H | -1.647102220147 | -1.351485444835 | 2.736608586455  |
| H | -5.263283544897 | -1.378909771702 | 0.019590845195  |
| H | -3.580936581151 | 3.179585442103  | -0.824138135860 |
| H | -6.826774960558 | 0.405509509852  | -0.588879644769 |
| H | -5.984945799607 | 2.695099191618  | -1.050099856576 |
| C | 3.075462355281  | -0.173029049517 | 0.068296573864  |
| C | 4.087841862785  | -1.129785138909 | 0.386488775624  |
| C | 3.561384030468  | 1.014439515104  | -0.559143892996 |
| C | 5.394683306866  | -0.902043773907 | 0.094229375528  |
| H | 3.845444388684  | -2.048758335757 | 0.901093738824  |
| C | 4.881624658005  | 1.180022470797  | -0.838016989030 |
| H | 2.875511147049  | 1.793982765239  | -0.859917838740 |
| H | 6.171089306849  | -1.612068771739 | 0.347216667830  |
| H | 5.255833718555  | 2.065057461861  | -1.335726448102 |
| N | 5.808117225748  | 0.238143773148  | -0.520961982248 |
| C | 7.232389480425  | 0.479884022523  | -0.757291895131 |
| H | 7.347819046852  | 1.140076714692  | -1.615365068395 |
| H | 7.691876805187  | 0.939018970642  | 0.120113284511  |
| H | 7.727906235600  | -0.464635291125 | -0.976732183520 |

Unrestricted B3LYP/6-311G(d,p) **BDHPy**\* optimized Cartesian coordinates in acetonitrile.

|   |                 |                 |                 |
|---|-----------------|-----------------|-----------------|
| C | 2.229115917097  | -1.129916660037 | -0.193062154792 |
| C | -2.069826464515 | 2.540790662844  | -0.262740454753 |
| C | 1.992823009606  | -2.523694972108 | -0.211429947873 |
| C | -3.363098224958 | 2.108031846414  | -0.157543542862 |
| C | 0.672774933406  | -2.974683039460 | -0.009182092490 |
| C | -3.596493937898 | 0.692639145612  | 0.047303642824  |
| C | -0.390196980017 | -2.128733130700 | 0.237400952020  |
| C | -2.621782251543 | -0.255592963092 | 0.013201984483  |
| C | 1.260990405587  | -0.180540730325 | 0.071529208288  |
| C | -0.956722922906 | 1.643720512023  | -0.234751170055 |
| C | -1.764057672118 | -2.597574559402 | 0.342013117282  |
| C | -2.862709491342 | -1.683003560451 | 0.248090096163  |
| C | 0.330041136830  | 2.094616171339  | -0.124583639882 |
| C | 1.486996846815  | 1.250229719573  | 0.012674569573  |
| C | -0.154475122700 | -0.639552137128 | 0.447107301012  |
| C | -1.206933437226 | 0.151455751434  | -0.391080351242 |
| C | -0.324673474666 | -0.358664960519 | 1.975333800340  |
| C | -1.067251665284 | -0.173118478359 | -1.912558404704 |
| C | -4.174062108591 | -2.198973315473 | 0.352251045939  |
| C | -2.056386493892 | -3.968064224960 | 0.561029329646  |
| C | -4.425553698270 | -3.542823674930 | 0.556459430503  |
| C | -3.350270700197 | -4.437633997414 | 0.666078257026  |
| H | 3.217639599435  | -0.784664524575 | -0.467311990657 |
| H | -1.845316365089 | 3.599682550934  | -0.322834800664 |
| H | 0.473099236645  | -4.031219902862 | -0.121486105172 |
| H | -4.612412124527 | 0.392773435651  | 0.270817433836  |
| H | 0.471073853553  | 3.169030432643  | -0.067716330741 |
| H | -1.315660971687 | -0.652768384365 | 2.327360979166  |
| H | -1.264417077099 | -1.227335829394 | -2.117714281813 |
| H | -0.176704527735 | 0.699174715508  | 2.199127883131  |
| H | -0.061781511554 | 0.068054936184  | -2.264686373857 |
| H | 0.419176223668  | -0.935691067339 | 2.529436954876  |
| H | -1.783834601517 | 0.427320682530  | -2.477059427235 |
| H | -5.018358266542 | -1.528689385686 | 0.253640647458  |
| H | -1.240477210255 | -4.669879673658 | 0.678073580070  |
| H | -5.446828373223 | -3.899204216728 | 0.629484131882  |
| H | -3.530979185652 | -5.492562581389 | 0.840546658866  |
| C | 2.765716015728  | 1.867313733852  | 0.143042703942  |
| C | 3.033365186175  | 3.196542260741  | -0.342764258623 |
| C | 3.889253202541  | 1.269954399893  | 0.815686627408  |
| C | 4.247225785520  | 3.793211816724  | -0.196652335871 |
| H | 2.276784604270  | 3.746465691658  | -0.884470155697 |
| C | 5.078289846430  | 1.916203019282  | 0.957102148887  |
| H | 3.791952255247  | 0.302350166128  | 1.285035087343  |
| H | 4.455839777582  | 4.777590140200  | -0.592771863956 |
| H | 5.909733897153  | 1.479955470123  | 1.493993501772  |
| N | 5.288061426050  | 3.176196459952  | 0.452154152386  |
| C | 6.613460318567  | 3.794564094191  | 0.506377183991  |
| H | 7.120596340552  | 3.483228026422  | 1.418840618497  |
| H | 7.217307016955  | 3.502085093351  | -0.357025818296 |
| H | 6.506206612903  | 4.878201734775  | 0.517277882158  |
| C | 3.151721921219  | -3.479026044629 | -0.542195168515 |
| C | 3.675656452549  | -3.193232569365 | -1.971070567432 |
| C | 4.304916153543  | -3.268249485143 | 0.468662361944  |
| C | 2.734208627477  | -4.960330335026 | -0.476909864837 |
| H | 2.886572434008  | -3.350546902727 | -2.711926572416 |
| H | 4.033956132027  | -2.166249734216 | -2.073599050867 |
| H | 4.507364230538  | -3.862967876595 | -2.212679034795 |
| H | 3.970031285433  | -3.475814089296 | 1.489057190102  |
| H | 5.137468693704  | -3.941415805156 | 0.240598385862  |
| H | 4.687955083395  | -2.245551795458 | 0.441365626376  |
| H | 3.601220287282  | -5.593213458529 | -0.684983527159 |
| H | 2.354443082608  | -5.231230776599 | 0.512226255061  |
| H | 1.966278038801  | -5.202427569570 | -1.216484685142 |
| C | -4.575267979956 | 3.051171663803  | -0.174140449711 |
| C | -5.540406907537 | 2.628316524148  | -1.307927322714 |
| C | -5.319314013637 | 2.974386360832  | 1.181227963257  |
| C | -4.172787836026 | 4.517396197377  | -0.413832842069 |
| H | -5.047376514270 | 2.695540415585  | -2.281967309485 |
| H | -5.894946551944 | 1.602769137092  | -1.180645031917 |
| H | -6.416229790791 | 3.284429108437  | -1.324128795727 |
| H | -4.663953833931 | 3.282096048765  | 2.000964249442  |
| H | -6.188542554756 | 3.639325650497  | 1.172709582000  |
| H | -5.677556443262 | 1.965200497999  | 1.397027186486  |
| H | -5.068946193075 | 5.143177765986  | -0.441897294160 |
| H | -3.528832447278 | 4.898061384154  | 0.383492558490  |
| H | -3.648875083436 | 4.642320648007  | -1.365403331605 |

Unrestricted B3LYP/6-311G(d,p) BCPDPy\* optimized Cartesian coordinates in acetonitrile.

|   |                 |                 |                 |
|---|-----------------|-----------------|-----------------|
| C | -0.870040245493 | -1.941122931374 | 0.996176338389  |
| C | 0.475566767417  | 3.248329051568  | -0.175211306159 |
| C | 0.136905189073  | -2.892196971869 | 1.201988680160  |
| C | 1.736475494452  | 3.565729087505  | -0.674207221874 |
| C | 1.391100409041  | -2.581113465109 | 0.672513975737  |
| C | 2.718592489445  | 2.565062242790  | -0.569684485765 |
| C | 1.594060766130  | -1.486264593376 | -0.184450875687 |
| C | 2.523814716635  | 1.410755504387  | 0.201060393430  |
| C | -0.707556226665 | -0.842821966558 | 0.142836012437  |
| C | 0.218393648986  | 2.052620319813  | 0.536389637050  |
| C | 3.016066618298  | -1.042613454582 | -0.387055209744 |
| C | 3.471013676268  | 0.264829846097  | -0.013480380183 |
| C | -1.169252567837 | 1.595802493319  | 0.582945667776  |
| C | -1.662134956489 | 0.316040744143  | 0.279209817723  |
| C | 0.480616690137  | -0.737144574065 | -0.617657146068 |
| C | 1.335188633181  | 1.277374110975  | 0.951420950183  |
| C | 0.541633867704  | 0.107959867066  | -1.865334205286 |
| C | 1.289409720457  | 0.427569118355  | 2.194951991533  |
| C | 4.851546329908  | 0.510725341522  | -0.018149773681 |
| C | 3.969560892164  | -1.987403777558 | -0.790997792089 |
| C | 5.778983204732  | -0.453888112447 | -0.403546832829 |
| C | 5.333664273246  | -1.706892580377 | -0.810759714757 |
| H | -1.800285161185 | -2.017984511491 | 1.547716528393  |
| H | -0.372094305282 | 3.887380340270  | -0.393647429865 |
| H | 2.258027065468  | -3.160680054450 | 0.962080949898  |
| H | 3.641864532515  | 2.657742476582  | -1.129396646652 |
| H | -1.897444168502 | 2.401463120061  | 0.561238121586  |
| H | 1.5188214111017 | 0.561045537970  | -2.025452972555 |
| H | 2.126990720141  | -0.267093346353 | 2.246010877847  |
| H | -0.213455874539 | 0.891623916622  | -1.868334660460 |
| H | 0.362692545402  | -0.129559169661 | 2.313638790674  |
| H | 0.342761145408  | -0.543519381076 | -2.725390906709 |
| H | 1.375288932826  | 1.097850570425  | 3.060082248035  |
| H | 5.202269565472  | 1.489246150095  | 0.290311937115  |
| H | 3.625863732791  | -2.969821116442 | -1.095424211312 |
| H | 6.838113164355  | -0.222355655238 | -0.389749543667 |
| H | 6.038010341095  | -2.465445401209 | -1.133135932859 |
| C | -3.066364907632 | 0.079725378015  | 0.145931016196  |
| C | -4.078370603757 | 1.009471360298  | 0.589151010498  |
| C | -3.598142247594 | -1.091986487191 | -0.493026794849 |
| C | -5.402572288626 | 0.778886019320  | 0.393752112813  |
| H | -3.806183284214 | 1.909187510596  | 1.123356228003  |
| C | -4.933245048886 | -1.278958700197 | -0.675429232984 |
| H | -2.927532532257 | -1.851508767884 | -0.871596144490 |
| H | -6.163912918577 | 1.464281264025  | 0.740989702082  |
| H | -5.335101765426 | -2.152569882565 | -1.170051224636 |
| N | -5.863184249899 | -0.345762693268 | -0.254775857305 |
| C | -7.292971669891 | -0.625571596218 | -0.355298181619 |
| H | -7.498165377998 | -1.146635223458 | -1.290711296586 |
| H | -7.636596503834 | -1.244767642789 | 0.479400943741  |
| H | -7.846190864779 | 0.312732036130  | -0.351607872813 |
| C | -0.127043776774 | -4.132390948385 | 2.073971092250  |
| C | -0.509965311202 | -3.700493890449 | 3.508780757545  |
| C | -1.293135568779 | -4.941502347974 | 1.459596710313  |
| C | 1.102713126618  | -5.054805134662 | 2.161690578504  |
| H | 0.297870998099  | -3.126292516364 | 3.971125020821  |
| H | -1.411710003874 | -3.083896783957 | 3.520022564504  |
| H | -0.700061076665 | -4.580639225633 | 4.130984110190  |
| H | -1.044324126032 | -5.276888292036 | 0.448587792620  |
| H | -1.504271168713 | -5.825997956778 | 2.068652526737  |
| H | -2.208431006331 | -4.347646679372 | 1.401340947053  |
| H | 0.852988927173  | -5.942591845532 | 2.749039317990  |
| H | 1.428485580971  | -5.389289133930 | 1.172877464100  |
| H | 1.947627901894  | -4.563662051280 | 2.651861241128  |
| C | 2.042843723080  | 4.877854498373  | -1.418525068167 |
| C | 3.232786010384  | 5.584954376821  | -0.728349616045 |
| C | 2.414918503600  | 4.580206708091  | -2.889843356485 |
| C | 0.844337819392  | 5.844398429432  | -1.413162048013 |
| H | 2.993534561806  | 5.822897617958  | 0.312197566145  |
| H | 4.129004552280  | 4.960104673477  | -0.732590323474 |
| H | 3.471860496076  | 6.520179350027  | -1.244456073649 |
| H | 1.589318219065  | 4.082638016616  | -3.406613644560 |
| H | 2.636024796305  | 5.511441603571  | -3.420962295361 |
| H | 3.295420763110  | 3.937825723475  | -2.964437115540 |
| H | 1.123829097254  | 6.777172845700  | -1.910663815664 |
| H | -0.015534757831 | 5.431394925927  | -1.947390161268 |
| H | 0.528283444690  | 6.090038435745  | -0.395537689496 |

Unrestricted B3LYP/6-311G(d,p) transition state optimized Cartesian coordinates in acetonitrile for **BDHPPy<sup>•</sup>/BCPDPy<sup>•</sup>** thermal conversion.

|   |                 |                 |                 |
|---|-----------------|-----------------|-----------------|
| C | -0.907728155419 | -1.948954980418 | 0.965028079962  |
| C | 0.545247543957  | 3.356837096986  | 0.016142829505  |
| C | 0.079860636910  | -2.937993790602 | 1.163980868357  |
| C | 1.832032991442  | 3.676146934388  | -0.341482319685 |
| C | 1.371435210305  | -2.645000163491 | 0.695201602584  |
| C | 2.786270553733  | 2.597494185149  | -0.389314955095 |
| C | 1.654223904309  | -1.504807667882 | -0.050516117726 |
| C | 2.532407504760  | 1.343196917577  | 0.103512336325  |
| C | -0.697671694609 | -0.800887457466 | 0.217234147839  |
| C | 0.160044199628  | 2.033957641386  | 0.407367954886  |
| C | 3.069868862704  | -1.117272006673 | -0.284362386926 |
| C | 3.503752901495  | 0.230716608262  | -0.090897316302 |
| C | -1.181399189961 | 1.651511977791  | 0.341475382415  |
| C | -1.685460269407 | 0.319129562103  | 0.225108591648  |
| C | 0.599855694049  | -0.580765499004 | -0.397584230351 |
| C | 1.228462904778  | 1.064353945076  | 0.710835813841  |
| C | 0.619345878003  | 0.006338623586  | -1.804001122710 |
| C | 1.253333372933  | 0.526263483381  | 2.132129588065  |
| C | 4.881085828339  | 0.494885771892  | -0.150459110416 |
| C | 4.025753174457  | -2.092623296126 | -0.604310444636 |
| C | 5.814160721724  | -0.494339535754 | -0.449092720256 |
| C | 5.382949373118  | -1.795672691884 | -0.693519618864 |
| H | -1.872639133938 | -2.070632773160 | 1.444747920443  |
| H | -0.245570181391 | 4.096061509819  | -0.052248665413 |
| H | 2.195305697856  | -3.295325903435 | 0.959840125695  |
| H | 3.741775000788  | 2.780844840909  | -0.867273842572 |
| H | -1.887838842428 | 2.461068370003  | 0.183418964398  |
| H | 0.239438805314  | -0.746228955741 | -2.504035849192 |
| H | 1.983347003420  | -0.275013507334 | 2.256214288285  |
| H | 1.628808073598  | 0.272167531106  | -2.118330712100 |
| H | 0.273421577462  | 0.161356446007  | 2.443073524919  |
| H | -0.013295800447 | 0.889685768393  | -1.885717982796 |
| H | 1.536394348443  | 1.340330701472  | 2.810341547888  |
| H | 5.230422651551  | 1.499660231253  | 0.056367296922  |
| H | 3.691050140237  | -3.106641229075 | -0.792494227793 |
| H | 6.869223638966  | -0.247247354326 | -0.487425457477 |
| H | 6.093966120534  | -2.575489484064 | -0.942150165741 |
| C | -3.067772992176 | 0.092503703498  | 0.073574161758  |
| C | -4.074823373453 | 1.086411557265  | 0.370462529459  |
| C | -3.620480140779 | -1.142670498995 | -0.427796004568 |
| C | -5.399770808479 | 0.851717947115  | 0.183509049569  |
| H | -3.798205540121 | 2.041586818911  | 0.793497651793  |
| C | -4.956220339459 | -1.320709564384 | -0.604456397805 |
| H | -2.964842952401 | -1.954488616904 | -0.707434116432 |
| H | -6.152236719314 | 1.591702017235  | 0.420995672855  |
| H | -5.365448542624 | -2.238741229235 | -1.004045882023 |
| N | -5.871307224406 | -0.344370295901 | -0.295413246857 |
| C | -7.296788846681 | -0.536915160093 | -0.567273632251 |
| H | -7.546171286377 | -0.231753267326 | -1.587209528220 |
| H | -7.551729136424 | -1.587703469400 | -0.435956921250 |
| H | -7.881662845528 | 0.054646494304  | 0.135805581765  |
| C | -0.258699513644 | -4.214163216142 | 1.950006209144  |
| C | -0.676834448750 | -3.848329957150 | 3.394623294245  |
| C | -1.430801158540 | -4.948001050565 | 1.255371704855  |
| C | 0.932581766726  | -5.186920168551 | 2.028063573328  |
| H | 0.136282491314  | -3.335695141066 | 3.916349097596  |
| H | -1.552152709596 | -3.194731663317 | 3.409705700593  |
| H | -0.925495961021 | -4.752978475338 | 3.958640197501  |
| H | -1.159127511055 | -5.236729749625 | 0.235929827191  |
| H | -1.690808145001 | -5.856317793212 | 1.808054929283  |
| H | -2.325007573081 | -4.322636336555 | 1.201261910555  |
| H | 0.630101449962  | -6.093836520271 | 2.558647273930  |
| H | 1.279566460203  | -5.481953746567 | 1.033905825506  |
| H | 1.777658315393  | -4.755102136690 | 2.570887778985  |
| C | 2.271774870355  | 5.081148238653  | -0.780371192375 |
| C | 3.457868543652  | 5.545750804788  | 0.098419455381  |
| C | 2.719588519752  | 5.059080482292  | -2.261730396851 |
| C | 1.140816625225  | 6.115798896322  | -0.639277028849 |
| C | 3.164428310377  | 5.595132121996  | 1.151039754966  |
| H | 4.310972430034  | 4.867533232027  | 0.019127712764  |
| H | 3.793008768794  | 6.541670100521  | -0.208454816846 |
| H | 1.896725954702  | 4.745934436610  | -2.910677215136 |
| H | 3.040537159615  | 6.057137972365  | -2.576803605511 |
| H | 3.556148323344  | 4.375547211813  | -2.425317992399 |
| H | 1.509236905937  | 7.104339041955  | -0.927190374865 |
| H | 0.290365727587  | 5.879780857264  | -1.284621885424 |
| H | 0.779837598725  | 6.180589292249  | 0.390935166715  |

## 10. References

- (1) Roldan, D.; Cobo, S.; Lajolet, F.; Vilà, N.; Bochot, C.; Bucher, C.; Saint-Aman, E.; Boggio-Pasqua, M.; Garavelli, M.; Royal, G. A Multi-Addressable Switch Based on the Dimethyldihydropyrene Photochrome with Remarkable Proton-Triggered Photo-Opening Efficiency. *Chem. - Eur. J.* **2015**, *21* (1), 455–467.
- (2) Mitchell, R. H.; Ward, T. R. The Synthesis of Benz-, Naphth-, and Anth-Annulated Dihydropyrenes as Aids to Measuring Aromaticity by NMR. *Tetrahedron* **2001**, *57* (17), 3689–3695.
- (3) Sheepwash, M. A. L.; Mitchell, R. H.; Bohne, C. Mechanistic Insights into the Photochromism of *Trans*-10b,10c-Dimethyl-10b,10c-Dihydropyrene Derivatives. *J. Am. Chem. Soc.* **2002**, *124* (17), 4693–4700.
